1 Cloning of Two Gene Clusters Involved in the Catabolism of 2,4-Dinitrophenol by *Paraburkholderia* sp.  
2 Strain KU-46 and Characterization of the Initial DnpAB Enzymes and a Two-Component  
3 Monooxygenase DnpC1C2

4

5 Taisei Yamamoto,<sup>a</sup> Yaxuan Liu,<sup>a</sup> Nozomi Kohaya,<sup>a</sup> Yoshie Hasegawa,<sup>a</sup> Peter C.K. Lau,<sup>b</sup> Hiroaki Iwaki<sup>a#</sup>

6

7 <sup>a</sup>Department of Life Science & Biotechnology, Kansai University, Suita, Osaka, Japan

8 <sup>b</sup>Department of Microbiology and Immunology, McGill University, Montréal, Quebec, Canada

9

10

11 Running Head: Unique Pathway of 2,4-Dinitrophenol Catabolism

12 #Address correspondence to Hiroaki Iwaki, iwaki@kansai-u.ac.jp

13 **Abstract**

14 Besides an industrial pollutant, 2,4-dinitrophenol (DNP) has been used illegally as a weight loss drug that  
15 had claimed human lives. Little is known about the metabolism of DNP, particularly among  
16 Gram-negative bacteria. In this study, two non-contiguous genetic loci of *Paraburkholderia* (formerly  
17 *Burkholderia*) sp. strain KU-46 genome were identified and four key initial genes (*dnpA*, *dnpB*, and  
18 *dnpC1C2*) were characterized to provide molecular and biochemical evidence for the degradation of DNP  
19 via the formation of 4-nitrophenol (NP), a pathway that is unique among DNP utilizing bacteria. Reverse  
20 transcription PCR analysis indicated that the *dnpA* gene encoding the initial hydride transferase (28 kDa),  
21 and the *dnpB* gene encoding a nitrite-eliminating enzyme (33 kDa), are inducible by DNP and the two  
22 genes are organized in an operon. Purified DnpA and DnpB from overexpression clones in *Escherichia*  
23 *coli* effected the transformation of DNP to NP via the formation of hydride-Meisenheimer complex of  
24 DNP. The function of DnpB appears new since all homologs of DnpB sequences in the protein database  
25 are annotated as putative nitrate ABC transporter substrate-binding proteins. The gene cluster responsible  
26 for the degradation of DNP after NP formation was designated *dnpC1C2DXFER*. DnpC1 and DnpC2  
27 were functionally characterized as the respective FAD reductase and oxygenase components of the  
28 two-component NP monooxygenase. Both NP and 4-nitrocatechol were shown to be substrates,  
29 producing hydroquinone and hydroxyquinol, respectively. Elucidation of the *hqdA1A2BCD* gene cluster  
30 allows the delineation of the final degradation pathway of hydroquinone to  $\beta$ -ketoacid prior to its entry  
31 to the tricarboxylic acid cycle.

32

33 **Importance**

34 This study fills a gap in our knowledge and understanding of the genetic basis and biochemical pathway  
35 for the degradation of 2,4-dinitrophenol (DNP) in Gram-negative bacteria, represented by the prototypical  
36 *Paraburkholderia* sp. strain KU-46 that metabolizes DNP through the formation of 4-nitrophenol, a  
37 pathway unseen by other DNP utilizers. The newly cloned genes could serve as DNA probes in  
38 biomonitoring as well as finding application in new biocatalyst development to access green chemicals.  
39 By and large, knowledge of the diverse strategies used by microorganisms to degrade DNP will  
40 contribute to the development of bioremediation solutions since DNP is an industrial pollutant used  
41 widely in the chemical industry for the synthesis of pesticides, insecticides, sulfur dyes, wood  
42 preservatives, and explosives, etc. (119 words)

43

44 **Key word:** nitroaromatics, 2,4-dinitrophenol, 4-nitrophenol, two-component monooxygenase, hydride  
45 transferase, nitrite-eliminating enzyme, *Paraburkholderia*

## 46 **Introduction**

47 2,4-dinitrophenol (DNP) is a yellow crystalline organic compound, industrial uses of which include the  
48 production of wood preservatives, sulfur dyes, herbicides, photographic developers and explosives (1, 2).  
49 It is listed among the 126 priority pollutants of the United States Environmental Protection Agency  
50 regulated in the Clean Water programs (3). In cellular metabolism DNP acts as an ionophore, a classic  
51 uncoupler of mitochondrial oxidative phosphorylation made famous in 1961 by Peter Mitchell's  
52 chemiosmotic hypothesis. Interestingly, as early as 1933 the possible therapeutic use of DNP as a weight  
53 loss agent in humans was advocated due to its high metabolic rate (4). But unfortunately, serious adverse  
54 effects, acute toxicity including deaths due to hyperthermia, for example, had been reported over the  
55 years among users (e.g., bodybuilders) of the so-called yellow slimming pill (5). For a historical account  
56 and current development see Grundlingh et al. (6); Geisler (7).

57

58 In the environment, the major site of DNP degradation is the soil where certain microorganisms can  
59 metabolize it. Thus far, only a few bacterial strains capable of growth on DNP as its sole nitrogen or  
60 carbon source had been isolated, the majority of which were Gram-positive actinomycetes: *Rhodococcus*  
61 and *Nocardioides* (for reviews: 8, 9). Pioneering work of Knackmuss and co-workers who initially used  
62 strains of *Rhodococci* (HL 24-1 and 24-2) that were capable of growth on the DNP as well as picric acid  
63 (PA; 2,4,6-trinitrophenol) as the sole source of nitrogen and/or carbon, led to the identification of a  
64 hydride-Meisenheimer complex of DNP (designated H<sup>-</sup>-DNP; H<sup>-</sup>-PA in the case of PA) as a key  
65 intermediate (10). This initial step is the reduction of the aromatic ring, a reaction catalyzed by a  
66 NADPH-dependent F<sub>420</sub>-reductase and hydride transferase system. A second reduction and hydride  
67 transferase reaction results in the formation of 2,4-dinitro-cyclohexanone that either goes to the formation  
68 of 4,6-dinitrohexanoate or 3-nitroadipate of which the mechanism is not known (Fig. 1A) (11-13). The  
69 gene cluster containing the NADPH-dependent F<sub>420</sub> reductase encoded by *npdG*, and the hydride  
70 transferase encoded by *npdI* for the pathway in *R. (opacus) erythropolis* strain HL PM-1 had been  
71 identified (13). Both genes were subsequently found to be highly conserved among several  
72 DNP-degrading *Rhodococcus* spp. (13).

73

74 Our laboratory had isolated a Gram-negative *Paraburkholderia* (formerly *Burkholderia*) sp. strain KU-46  
75 that utilized DNP as the sole source of carbon and nitrogen and it degraded DNP via the formation of  
76 4-nitrophenol (NP) and 1,4-benzoquinone (15). A hypothetical reaction mechanism for the formation of  
77 NP from DNP was proposed that involved a hydride-Meisenheimer complex, modeled after the formation  
78 of H<sup>-</sup>-PA or H<sup>-</sup>-DNP in the degradation pathway of PA/DNP in *Rhodococcus* (9, 10, 16). Interestingly,

79 the cofactor F<sub>420</sub> system was reported to be limited in its taxonomic distribution and had never been  
80 reported in Gram-negative bacteria (17-19). We reckoned that strain KU-46 must likely possess a new  
81 enzyme system for the formation of H<sup>-</sup>-DNP. To gain a better understanding of the metabolism of DNP in  
82 a Gram-negative bacterium, we carried out molecular analysis and biochemical characterization of some  
83 of the key steps in the DNP pathway in strain KU-46. A consolidated pathway including a number of  
84 potential genes and regulatory elements is shown in Fig. 1. In addition, we discussed the  
85 diversity/evolution of DNP catabolism to related nitroaromatics.

86

## 87 **Results**

88 **Localization of NP monooxygenase encoding gene cluster in strain KU-46.** Fig. 1B delineates the  
89 genetic locus defined by the following results. First, the nucleotide sequence identity (83.5%) of the  
90 533-bp PCR-amplified product with an equivalent segment of a known oxygenase component of the  
91 2,4,6-trichlorophenol monooxygenase of *Cupriavidus pinatubonensis* JMP134, and 69.6% with the  
92 chlorophenol-4-monooxygenase of *Burkholderia cepacia* AC1100 (20, 21) provided an entry point to the  
93 genetic information in question. Subsequently, insertional inactivation of the amplified gene by  
94 homologous recombination and selection for Km-resistance gave rise to numerous colonies, 10 of which  
95 were selected and found incapable of growth on NP as a sole nitrogen source. One mutant, designated  
96 strain KU-46C2M, the result of a single crossover mutant (Fig. S1) was used for further study. Whereas  
97 this mutant was incapable of growth on DNP and NP as a sole carbon source, it was able to grow on DNP  
98 as a nitrogen source. Besides, stoichiometric accumulation of NP in the media was observed when DNP  
99 in concentration of 0.1 – 1.0 mM was used (Fig. S2). At the lowest concentration, DNP was depleted after  
100 24 h whereas at higher concentrations it took twice as long. Growth of strain KU-46C2M on DNP as a  
101 nitrogen source was attributed to the release of one nitro group from DNP as a nitrite. We designated *dnp*  
102 for the DNP-degradation pathway genes, and the initially amplified gene as *dnpC2* (Fig. 1B). These  
103 results indicated that the *dnpC2* is responsible for DNP degradation and that it is degraded via NP as  
104 proposed previously (15).

105 Flanking regions of the partial *dnpC2* gene were amplified with the aim of localizing the gene  
106 cluster for DNP degradation. By primer walking the amplified fragments were sequenced to provide a  
107 contiguous segment of 14,808-bp. Computer analysis showed the presence of 14 complete open reading  
108 frames (ORFs), 11 of which are on one strand, the remaining in the opposite direction (Fig. 1B).

109 **Sequence characteristics of *dnpC2* and upstream ORF.** The nucleotide sequence of *dnpC2*  
110 consists of 1554 bp that is preceded by an appropriate Shine-Dalgarno (SD) sequence, AGGA, 7 bp from  
111 the predicted ATG start codon. The 517-residue DnpC2 polypeptide is most similar in sequence to the  
112 functionally characterized oxygenase component of the two component NP and chlorophenol  
113 monooxygenases, viz., 2,4,6-trichlorophenol monooxygenase TcpA from *Cupriavidus pinatubonensis*  
114 JMP134 (86.1% identity) (21); 2,4,6-trichlorophenol monooxygenase HapD from *Ralstonia pickettii*  
115 DTP0602 (85.7% identity) (22); and chlorophenol-4-monooxygenase TftD from *Burkholderia cepacia*  
116 AC1100 (65.9% identity) (20).

117 Upstream of *dnpC2* and arranged in the same direction is *orf4* that consists of 193 codons, and  
118 preceded by a consensus SD sequence, GGAG. The translated product of *orf4* resembles the FAD

119 reductase component of the two-component phenol monooxygenases: e.g., HadX of 2,4,6-trichlorophenol  
120 monooxygenase from *Ralstonia pickettii* DTP0602 (57.8%) (22), TftC of chlorophenol-4-monooxygenase  
121 from *Burkholderia cepacia* AC1100 (57.8%) (20), and TcpX of 2,4,6-trichlorophenol monooxygenase  
122 from *Cupriavidus pinatubonensis* JMP134 (51.4% identity) (21). On the basis of the results of homology  
123 searches, *orf4* is designated *dnpC1* and predicted to encode the reductase component of the  
124 two-component NP monooxygenase system, evidence of which is presented below.

125

126 **Functional analysis of *dnpC1* and *dnpC2* genes.** At first, overexpression clones of DnpC1C2 and  
127 the two individually were verified by SDS-PAGE for their protein production (Fig. S3). The molecular  
128 mass of His<sub>10</sub>-tagged DnpC1 (H<sub>10</sub>-DnpC1) was determined to be 24 kDa in good agreement with the  
129 predicted relative molecular mass ( $M_r$ ) of 22,441. Those of DnpC2 and His<sub>10</sub>-tagged DnpC2 (H<sub>10</sub>-DnpC2)  
130 were 58 kDa and 59 kDa, respectively, the corresponding predicted  $M_r$  being 58,339 and 60,266,  
131 respectively.

132 *E. coli* whole cells harboring *dnpC1C2* in pET-dnpC1C2 expression plasmid converted NP to  
133 hydroquinone at a rate of 0.43 mM·hr<sup>-1</sup> (Fig. 2, Fig. S4). At a cell density of 1.0 at OD<sub>600</sub> these cells  
134 converted 0.1 mM NP completely within 20 min. On the other hand, *dnpC1* (pET-dnpC1) alone was not  
135 able to transform NP, but *dnpC2* (pET-dnpC2) gave a detectable amount of hydroquinone in the reaction  
136 mixture (Fig. 2, Fig. S4). The conversion rate was 22% compared to that of the full gene complement,  
137 *dnpC1C2*. 4-Nitrocatechol was also transformed at a rate of 0.87 mM·hr<sup>-1</sup> by DnpC1C2 giving  
138 hydroxyquinol as a product (Fig. 2, Fig. S4).

139 **Additional NP and 4-nitrocatechol degradation genes and unknown ORFs.** Downstream of  
140 *dnpC2* and on the same DNA strand are *orf5*, 6, 7, and 8, followed by *orf9* on the opposite strand (Fig.  
141 1B). On the basis of the sequence similarities in addition to the analogy with the 2,4,6-trichlorophenol  
142 degradation pathway of *Cupriavidus pinatubonensis* JMP134 (23) and *Ralstonia pickettii* DTP0602 (22),  
143 we designated *orf5*, 7, 8, and 9 to the DNP and NP-degrading genes, *dnpD*, *dnpF*, *dnpE* and *dnpR*,  
144 respectively (Table 1, Fig.1, Fig. S5). The *dnpD*, *dnpF*, *dnpE* and *dnpR* genes and *orf6* were predicted to  
145 encode quinone reductase, maleylacetate reductase, hydroxyquinol-1,2-dioxygenase, the LysR family  
146 transcriptional regulator and FMN adenylyltransferase, respectively.

147 The *orf10* product has no apparent sequence homolog in the protein database whereas *orf11* and  
148 *orf12* products showed significant sequence identity to AraC family transcriptional regulator and LysR  
149 family transcriptional regulator, respectively. The *orf13* product showed similarity with putative  
150 oxidoreductases that contain the old yellow enzyme (OYE)-like FMN binding domain. Some of the OYE  
151 family enzymes have been found to catalyze formation of hydride–Meisenheimer complex from

152 2,4,6-trinitrotoluene (24-26). However, the C-terminus region of Orf13 appeared to be truncated by about  
153 90 amino acids compared to the homologs.

154

155 **Establishment of the initial genes responsible for the conversion of DNP to NP and functional**  
156 **analysis.** Upstream of *dnpC1* (*orf4*) and in the same direction, there are three ORFs within the sequenced  
157 region by which we employed RT-PCR method to test if they are inducible and the designate for the  
158 initial genes of the DNP degradation pathway using *orf2* and *orf13* as candidates, and *dnpC2* as a positive  
159 control of NP and DNP induced genes. Amplification of a 1.4-kb fragment indicated that *orf2* and *orf3*  
160 are on an operonic unit as suggested by the proximity of the two genes (Fig. 1C). We designated *orf2* and  
161 *orf3* as *dnpA* and *dnpB*, respectively. On the other hand, *orf13* is not induced by DNP or NP.

162 Characteristics of *dnpA* and *dnpB* are as follows: The coding sequence of *dnpA* consists of 738  
163 nucleotides with an appropriately positioned consensus SD sequence, GGAGGT, 7 bp from the putative  
164 ATG start site. DnpA shares 99.6% sequence identity with a hypothetical short-chain  
165 dehydrogenase/reductase (SDR) of an unknown function from *Paraburkholderia terrae* BS001 (Table 1).  
166 The most similar protein in Protein Data Bank (PDB) is 3-oxoacyl-(acyl-carrier-protein) reductase  
167 (FabG1) from *Staphylococcus aureus* subsp. aureus NCTC 8325 (PDB acc. no. 3SJ7) (27) with 36%  
168 identity. A predicted secondary structure of DnpA is shown in Fig. S6. The secondary structure elements  
169 are similar to those of FabG1 (Fig. S6). Notable sequence features of DnpA are the conservation of a  
170 cofactor-binding motif, TGxxxGIG, near the N-terminus of the protein (28) and in addition two key Arg  
171 residues which are characteristics of NADP(H)-preferred enzymes (Fig. S6). DnpA sequence, however,  
172 lacks a conserved tyrosine (replaced by Leu) in the catalytic YxxxK motif of known SDRs (28).

173 The *dnpB* gene is located downstream of *dnpA* in the same direction, and separated by a 90-bp  
174 intergenic sequence that is preceded by a consensus SD sequence (GAGGT); it is 867-bp and encodes a  
175 polypeptide of 288 residues. The BLAST search revealed homologous sequences that were annotated as  
176 putative ABC transporter substrate-binding proteins. Specifically nitrate ABC transporter  
177 substrate-binding protein of *Paraburkholderia terrae* BS001 scored the highest (Table 1). In terms of  
178 Conserved Protein Domain search, DnpB falls in the family of periplasmic-binding protein  
179 type2-superfamily.

180 Transformation assays with whole cells of *E. coli* harboring pET-dnpAB, which expresses DnpA  
181 and DnpB, measured by UV-visible light absorption spectrum indicated time-dependent shifts of  
182 absorption maxima at 360 nm to 400 nm. This corresponded to the depletion of DNP and the production  
183 of NP (Fig. 3A) identified by HPLC with a single peak at a retention time of 3.7 min and a photodiode  
184 array spectrum (Fig. S7), indicating that *dnpAB* are the initial genes responsible for the degradation of

185 DNP. We also performed transformation assay of PA (a non-growth substrate of strain KU-46) with  
186 whole cells of *E. coli* harboring pET-dnpAB. Time-dependent shifts of absorption maxima at 355 nm to  
187 400 nm corresponding to the depletion of PA was observed with the production of NP identified by  
188 HPLC with a single peak at a retention time of 3.9 min (Fig. 4, Fig. S8).

189 To analyze the function of DnpA and DnpB, His-tagged proteins designated H<sub>10</sub>-DnpA and  
190 H<sub>10</sub>-DnpB were produced in *E. coli* containing plasmids pET-dnpA and pET-dnpB, respectively. Analysis  
191 of the purified proteins on SDS-PAGE correctly verified the expected molecular masses of the two  
192 proteins (Fig. S9). The experimental and predicted mass of H<sub>10</sub>-DnpA are 32 and 28.121; those of  
193 H<sub>10</sub>-DnpB are 30 and 33.465 kDa. In the conversion of DNP by whole cells of *E. coli* harboring  
194 pET-dnpA, or *dnpA* alone, the transformation product was identified as H<sup>-</sup>-DNP with the characteristic  
195 UV-visible light absorption spectrum,  $\lambda_{\max}$  =306 and 440 (Fig. 3B) (29). Appearance of an isosbestic  
196 point at 405 nm indicated that DNP was transformed to H<sup>-</sup>-DNP (Fig. 3B) (29). This was supported by  
197 HPLC analysis showing an identical retention time (2.6 min), and UV-visible spectrum with photodiode  
198 array detector,  $\lambda_{\max}$  =258, 306, and 440, of the product with the synthetic H<sup>-</sup>-DNP (Fig. S10). On the  
199 other hand, *E. coli* whole cells harboring pET-dnpB, or *dnpB* alone, caused a hypsochromic shift of  
200 absorption maxima at 430 nm to 400 nm in the conversion of H<sup>-</sup>-DNP (Fig. 3C). This corresponded to  
201 depletion of H<sup>-</sup>-DNP and the production of NP. Supporting data for this came from HPLC analysis that  
202 showed an identical retention time (3.7 min), and UV-visible spectrum with photodiode array detector,  
203  $\lambda_{\max}$  =400 nm, of the product with authentic NP (Fig. S11). The overall results indicated that *dnpA*  
204 encodes a hydride transferase catalyzing the conversion of DNP to H<sup>-</sup>-DNP, and *dnpB* encodes a  
205 nitrite-eliminating enzyme that transforms H<sup>-</sup>-DNP to NP and nitrite.

206 We also performed transformation assay of PA by whole cells of *E. coli* harboring *dnpA* alone. In the  
207 conversion of PA by the cells, a bathochromic shift was detected, and the transformation product was  
208 identified as 2H<sup>-</sup>-PA with the characteristic UV-visible light absorption spectrum  $\lambda_{\max}$  =390, and a  
209 shoulder at 440 to 480 nm (Fig. S12A) (13). 2H<sup>-</sup>-PA was also converted to NP by *E. coli* whole cells  
210 harboring *dnpB* alone (Fig. S12B).

211

212 **Transformations by purified DnpA and DnpB.** To exclude any action of *E. coli* inherent enzyme in the  
213 transformation of DNP and H<sup>-</sup>-DNP, and to analyze possible coenzyme requirement, transformation  
214 assays were performed with purified HAT-tagged DnpA (H-DnpA) and H<sub>10</sub>-DnpB (Fig. S9).  
215 Transformation of DNP to H<sup>-</sup>-DNP with purified H-DnpA was achieved when NADPH was used in the  
216 reaction mixture (Fig. 5; Fig. S13), whereas NADH did not work. On the other hand, transformation of  
217 H<sup>-</sup>-DNP to NP with purified H<sub>10</sub>-DnpB did not require any cofactor (Fig. 6; Fig. S14).



218 We also performed transformation assays of non-growth substrate of strain KU-46, PA, with  
219 purified H-DnpA and H<sub>10</sub>-DnpB. In the transformation of PA by H-DnpA, a two-step time-dependent  
220 shifts of absorption maxima of UV-visible light absorption spectra were observed (Fig. 7A). In the first  
221 step, a bathochromic shift was detected (Fig. 7B). The transformation product was identified as hydride  
222 Meisenheimer complex of PA (H<sup>-</sup>-PA) with the characteristic UV-visible light absorption spectrum  
223 features,  $\lambda_{\max}$ =420 nm and a shoulder at around 490 nm (13, 30). In the second step, a hypsochromic shift  
224 from  $\lambda_{\max}$ =420 to 400 indicated H<sup>-</sup>-PA was transformed to dihydride Meisenheimer complex of PA  
225 (2H<sup>-</sup>-PA) (Fig. 7C) (13). The formation of both H<sup>-</sup>-PA and 2H<sup>-</sup>-PA was supported by HPLC analysis (Fig.  
226 S15A-C). After the purified H-DnpA was removed from the reaction mixture by Amicon Ultra-4 10 kDa  
227 (Merck Millipore), purified H<sub>10</sub>-DnpB was added to the reaction mixture. Time-dependent shifts of  
228 absorption maxima of UV-visible light absorption spectra with two steps were also observed involving at  
229 first (Fig. 7D). A bathochromic shift and a formation of second absorption maxima at 306 nm, indicative  
230 of formation of H<sup>-</sup>-DNP (Fig. 7E) followed by a hypsochromic shift to  $\lambda_{\max}$ =400, indicating formation of  
231 NP (Fig. 7F). The formation of NP was supported by HPLC analysis (Fig. S15D). HPLC analysis also  
232 showed the formation of DNP (Fig. S15D).

233

234 **Localization of hydroquinone degradation genes.** The genes encoding hydroquinone dioxygenase and  
235 4-hydroxymuconic semialdehyde dehydrogenase were absent in the sequenced 15-kb region.  
236 Amplification by the degenerate primer sets (hqdA2-F and hqdA2-R, and hqdB-F and hqdB-R; Table 2),  
237 gave rise to DNA fragments of 686-bp and 986-bp, respectively. As expected, the deduced amino acid  
238 sequences from these fragments showed similarity to those of known hydroquinone dioxygenase large  
239 subunit, and 4-hydroxymuconic semialdehyde dehydrogenase, respectively (Table 1). Furthermore, using  
240 primer set hqdA2-F and hqdB-R, a 2.2-kb DNA fragment was obtained, indicating *hqdA2* and *hqdB* are  
241 adjacent to each other in the order of *hqdA2-hqdB*. The flanking regions of the 2,208-bp region were  
242 amplified to isolate the hydroquinone degradation genes. Consequently, from a contiguous segment of  
243 sequenced DNA of 6,754-bp, six complete ORFs and 2 partial ORFs were obtained (Fig. 1D). On the  
244 basis of their sequence relatedness to known proteins ranging from 80-92% identity (Table 1), the first  
245 two ORFs were designated *hqdA1* and *hqdA2*, to encode the small subunit and large subunit of  
246 hydroquinone dioxygenase, respectively. The *hqdB*, *hqdD* and *hqdC* genes were predicted to encode  
247 hydroxymuconic semialdehyde dehydrogenase, maleylacetate reductase, and  
248 hydroxyquinol-1,2-dioxygenase, respectively.

## 249 Discussion

250 In this study, a molecular view of DNP metabolism by a Gram-negative bacterium is surfacing for the  
251 first time. The genetic basis for the initial reaction, namely the removal of a nitrite from DNP to form NP  
252 via a hydride-Meisenheimer complex, is attributed to the co-transcribed *dnpA* and *dnpB* genes that encode  
253 a 28-kDa hydride transferase (DnpA) and a 33-kDa nitrite-eliminating enzyme (DnpB), respectively (Fig.  
254 1). Both DnpA and DnpB are new entities. DnpA is a novel member of the large superfamily of SDRs  
255 since no such ascribed activity had been reported previously (31). Interestingly, like DnpA, of which a  
256 3-oxoacyl-(ACP) reductase is the closest homolog, that of ANI02794.1, was recently found to function as  
257 a 17 $\beta$ -hydroxysteroid dehydrogenase in the conversion of 17 $\beta$ -estradiol into estrone in *Pseudomonas*  
258 *putida* SJTE1 (32). Members of SDRs are known to have diverse functions and they are distantly related  
259 with typically 20-30% residue identity in pair-wise comparisons. Structurally, DnpA was predicted to  
260 share similar features of FabG1 from *S. aureus* (PDB:3SJ7), an enzyme that utilizes NADPH to reduce  
261  $\beta$ -ketoacyl-ACP to (S)- $\beta$ -hydroxyacyl-ACP. As expected of the conserved sequence motifs in DnpA (Fig.  
262 S6) the transformation of DNP to H<sup>-</sup>-DNP with purified DnpA was achieved in the presence of NADPH.  
263 On the other hand, transformation of H<sup>-</sup>-DNP to NP with purified DnpB did not require any of the  
264 nicotinamide cofactor. DnpB belongs to the type 2 periplasmic binding fold superfamily, the majority of  
265 which are involved in the uptake of a variety of soluble substrates such as phosphate, sulfate, nitrate,  
266 polysaccharides, lysine/arginine/ornithine, and histidine (33). However, this family also includes  
267 ionotropic glutamate receptors and unorthodox sensor proteins involved in signal transduction. Hence, it  
268 should come to no surprise that one such member would have a catalytic activity, two previous examples  
269 being 2'-hydroxybiphenyl-2-sulfinase (DszB) (34), and THI5:  
270 4-amino-5-hydroxymethyl-2-methylpyrimidine phosphate synthase (THI-5) (35).

271 Interestingly, DnpAB also transformed PA to NP and DNP, despite PA was not utilized by strain  
272 KU-46 as a growth substrate. We proposed the reaction sequence of NP and DNP formation from PA as  
273 shown in Fig. 8. Our results indicated that DnpA catalyzes the two sequential reactions: PA to H<sup>-</sup>-PA and  
274 H<sup>-</sup>-PA to 2H<sup>-</sup>-PA. In Gram-positive actinomycetes, the formation of 2H<sup>-</sup>-PA is catalyzed by two  
275 enzymes – first, a hydride transferase II encoded by *npdI* catalyzes the formation of H<sup>-</sup>-PA from PA,  
276 and second, a hydride transferase I encoded by *npdC* catalyzes the formation of 2H<sup>-</sup>-PA from H<sup>-</sup>-PA (36).  
277 The formation of DNP and NP from a mixture of 2H<sup>-</sup>-PA and H<sup>-</sup>-PA during DnpB reaction without  
278 DnpA indicated that DnpB catalyzes nitrite-elimination from both H<sup>-</sup>-PA and 2H<sup>-</sup>-PA. In contrast,  
279 nitrite-eliminating enzyme from Gram-positive actinomycetes was assumed to only accept the 2H<sup>-</sup>-PA as  
280 substrate due to the fact that DNP was not produced from PA in Gram-positive actinomycetes. Despite  
281 that DnpAB catalyzed the transformation of PA to NP, PA was not utilized as nitrogen and/or carbon

282 source for growth of strain KU-46. This suggests that transcriptional regulator for *dnpAB* does not  
283 recognize PA as inducer, i.e., transcription of *dnpAB* is not activated by PA.

284 From a genomics perspective, both *dnpA* and *dnpB* genes and their organization are conserved in  
285 the various completely sequenced genomes of *Paraburkholderia* spp. (Fig. S16, Table S1). This mirrors  
286 the conserved nature of the *npdG* and *npdI* genes among numerous *Rhodococci* capable of degrading  
287 DNP and NP where the 27 kDa NADPH-dependent F<sub>420</sub> reductase and the 32.9 kDa hydride transferase  
288 (HTII), unrelated in sequence or structure to DnpA and DnpB, respectively, had evolved to carry out the  
289 same nitrite removal via the formation of hydride Meisenheimer complexes (13, 14). The NpdG functions  
290 to shuttle the hydride ions from NADPH to F<sub>420</sub>, the biosynthesis of which is apparently absent in  
291 Gram-negative bacteria but instead where the redox factors FAD, FMN and NAD(P) are ubiquitous (18).

292 Initial access to the *dnp* genetic locus of *Paraburkholderia* sp. strain KU-46 was made possible by  
293 homology probing that led to the identification of the two-component *dnpC1C2* genes encoding the  
294 reductase and oxygenase components of the NP monooxygenase. This appears to be the first report for a  
295 two-component NP monooxygenase from the genera *Burkholderia* and *Paraburkholderia* while a single  
296 component NP monooxygenase (PnpA) was described recently in *Burkholderia* sp. SJ98 for the  
297 degradation of 3-methyl-4-nitrophenol to methyl-1,4-benzoquinone as the first intermediate (37).  
298 However, several two-component *para*-nitrophenol monooxygenases have been reported in  
299 Gram-positive bacteria such as *Rhodococcus imtechensis* RKJ300 that initiates the degradation of  
300 2-chloro-4-nitrophenol (38) or the *hadXA* genes of *Ralstonia pickettii* DTP0602 involved in the  
301 degradation of halogenated phenols and nitrophenols (39), among many others (23, 40-43; for reviews: 8,  
302 9, 44). Of particular interests are the HadX reductase of *R. pickettii* DTP0602 and TcpA oxygenase  
303 components of 2,4,6-trichlorophenol monooxygenase of *C. pinatubonensis* JMP134, which are most  
304 identical in sequence to the respective DnpC1 and DnpC2 (Table 1). By and large, the  
305 2,4,6-trichlorophenol monooxygenases of both the TcpXA and HadXA systems are most related to  
306 DnpC1C2 and the homologies extend beyond to include putative quinone reductase (DnpD),  
307 maleylacetate reductase (DnpF), hydroxyquinol-1,2-dioxygenase (DnpE), and the LysR-type  
308 transcriptional regulator (DnpR) (Fig. S5). Evidently, some gene rearrangements had occurred among the  
309 three organisms. In at least the sequenced genome of strain DTP0602 it is known that the *hadRXABC*  
310 gene cluster is separated from that of *hadSYD* by 146-kb where *hadD* is the maleylacetate reductase  
311 encoding gene (22, 45). Whereas in strain KU-46, this same gene (*dnpF*) is only 0.9-kb downstream of  
312 *dnpD* (quinone reductase), a similar situation found in strain JMP134 (Fig. S5).

313 In the biotransformation, *E. coli* whole cells harboring *dnpC1C2* converted NP to hydroquinone,  
314 and 4-nitrocatechol to hydroxyquinol. Benzoquinone was not detected in the *E. coli* whole cell

315 transformation assay probably due to the action of an unknown broad substrate reductase(s) in *E. coli* (46,  
316 47). In strain KU-46, the responsible reductase would be DnpD, a protein yet to be purified and its  
317 activity tested. However, the sequence of DnpD is most related to the established quinone reductases of  
318 TcpB and HadB of the 2,4,6-trichlorophenol degradation pathways in strains JMP134 and DTP0602,  
319 respectively (23, 39). Hence, in all likelihood the posing of benzoquinone in the DNP degradation  
320 pathway of strain KU-46 leading to the formation of hydroquinone or hydroxyquinol from 4-nitrocatechol  
321 is correct as presented in Fig. 1.

322 For comparison, *Rhodococcus opacus* strain SAO101 degrades NP via a hydroxyquinol pathway  
323 whereby a two-component oxygenase/reductase system (*npcA* and *npcB*) is responsible for an initial  
324 conversion of NP to 4-nitrocatechol followed by the formation of hydroxy-1,4-benzoquinone and then  
325 reduction to hydroxyquinol (40). Interestingly, Yamamoto et al. (43) reported the presence of a  
326 hydroquinone pathway in *Rhodococcus* sp. strain PN1 in which the two-component NpsA1A2  
327 hydroxylase system whose amino acid sequences are 100% identical to those of NpcA and NpcB  
328 converted NP to 2-hydroxy-1,4-benzoquinone via 1,4-benzoquinone. Previously, strain PN1 was found to  
329 contain another two-component hydroxylase system NphA1A2 that converted NP to 4-nitrocatechol in a  
330 pathway similar to that of the NpcAB system of strain SAO101 (42). Fig. 9 summarizes the status of NP  
331 oxidation and the responsible enzymes that have been cloned from the indicated bacteria. Although not  
332 shown in Fig. 9, the 2-chloro-NP degradation system of *Rhodococcus imtechensis* RKJ300 (38) was  
333 found to have a *para*-nitrophenol monooxygenase, PnpA1A2, that was identical in amino acid sequences  
334 to those of NpcAB, and that they converted 2-chloro-NP to 2-hydroxy-1,4-benzoquinone via  
335 chloro-1,4-benzoquinone or chlorohydroquinone to hydroxy-1,4-hydroquinone, indicating that this type  
336 of NP monooxygenase had phenol 4-monooxygenase activity. The two component chlorophenol  
337 monooxygenases from genera *Burkholderia*, *Ralstonia* and *Cupriavidus* also exhibit phenol  
338 4-monooxygenase activity (20, 22, 23). Phylogenetic analysis showed that these NP- and chlorophenol  
339 monooxygenases, except for *nphA1A2* from *Rhodococcus* sp. strain PN1, belong to the phenol  
340 4-monooxygenase group (Fig. S17). In common they catalyze two sequential oxidations from NP or  
341 chlorophenol to hydroxyquinol (48). In contrast, DnpC1C2 catalyzed NP to benzoquinone in a single  
342 reaction negating the formation of 2-hydroxy-1,4-benzoquinone unlike the case of NpsA1A2 in strain  
343 PN1 (Fig. 9).

344 In the latter part of this study, we isolated a gene cluster *hqdA1A2BDC*, predicted to contain  
345 two-component hydroquinone dioxygenase genes, *hqdA1A2*. The *hqdA1A2BDC* genes have the same  
346 orientation as the hydroquinone and 4-hydroxyacetophenone degrading genes from *Pseudomonas*  
347 *fluorescens* ACB (49), and the NP degrading genes from *Pseudomonas* spp. and *Burkholderia* sp. strain

348 SJ98 (37, 50-54). In these pathways, the hydroquinone degrading genes are adjacent to the gene encoding  
349 nitrophenol monooxygenase and a 4-hydroxyacetophenone monooxygenase, respectively (Fig. S18).  
350 *Burkholderia* sp. strain SJ98 has two hydroquinone degrading gene clusters, *pnpABAI CDEFG* and  
351 *npcCDEFG* (37). Whereas the *pnpABAI CDEFG* cluster is linked to NP degrading gene, the *npcCDEFG*  
352 cluster is not. And because the latter cluster was not upregulated by NP induction Min et al. concluded  
353 that the *npcCDEFG* cluster was unlikely involved in NP catabolism (37). In the present case there is no  
354 experimental evidence to indicate that the *hqdA1A2BDC* genes in strain KU-46 are directly responsible  
355 for NP and DNP degradation. Future studies would attest to this possibility.

356 In conclusion, this study fills a gap in our knowledge of DNP degradation in a Gram-negative  
357 bacterium as well as enhances our understanding of the genetics and biochemical diversity of catabolism  
358 of the culpable DNP and derivatives. Further, it reiterates the need to characterize an organism not only to  
359 enrich the little we know about microbial diversity at large but also because microorganisms may have  
360 new metabolic or biocatalytic properties that can be explored for bioremediation or green processes such  
361 as biocatalysis. Lastly, DNP was recently repositioned as a potential disease-modifying drug for a number  
362 of insidious diseases in humans such as Huntington, Alzheimer, Parkinson, multiple sclerosis and  
363 amyotrophic lateral sclerosis (7). At any rate, knowledge of the many ways DNP can be metabolized will  
364 likely be relevant to the possible fate of the drug in human gut microbiota.

## 365 MATERIALS AND METHODS

366 **Bacterial strains and growth conditions.** The bacterial strains and plasmids used in this study are listed  
367 in Table 2. *Paraburkholderia* sp. strain KU-46 was grown at 30°C in 1/2 Miller's LB (Merck Millipore)  
368 medium or mineral salt medium (MSM), containing DNP as nitrogen source and succinate as carbon  
369 source (15). *E. coli* was grown in Miller's LB medium or M9 medium containing the following  
370 components: 2 mM MgSO<sub>4</sub>·7H<sub>2</sub>O, 0.2 mM CaCl<sub>2</sub>·2H<sub>2</sub>O, 0.002% (w/v) thiamine hydrochloride, 0.002%  
371 (w/v) L-proline, and 0.3% (w/v) disodium succinate hexahydrate in M9 salt solution (58). Cultures were  
372 incubated at 30°C for the *Paraburkholderia* strains and 37°C for the *E. coli* strains, unless otherwise  
373 specified. When necessary, the medium was supplemented with ampicillin (Ap; 100 µg/ml),  
374 chloramphenicol (Cm; 20 µg/ml) or kanamycin (Km; 50 µg/ml).

375 **Isolation and sequencing of DNP degrading gene cluster.** Based on the amino acid sequence  
376 alignment of the oxygenase components of the two-component phenol monooxygenases (22, 40, 41, 59,  
377 60) two conserved peptide segments (G-N-P-[NED]-H-A-K at position 273-279 in TcpA of *C.*  
378 *pinatubonensis* strain JMP134, and F-E-[NK]-F-N-G-T-P at position 443-450 in TcpA of strain JMP134)  
379 were chosen for the design of degenerate primers, TC-FDM-F and TC-FDM-R, (Table 3) for PCR  
380 amplification using Hot Start *Taq* DNA Polymerase (New England Biolabs). The amplification  
381 conditions were as follows: 95°C for 2 min; 30 cycles at 95°C for 30 s, 55°C for 30 s, and 72°C for 30 s.  
382 The 533-bp amplified product was cloned in the vector pXcmkn12 (56) before sequencing, and the  
383 resulting plasmid was designated pX-dnpC1 (Table 2).

384 Continuous inverse-PCRs were employed to obtain the flanking fragments with various pairs of  
385 primers (Table 3). The inverse PCR was conducted with step-down cycle using KOD FX Neo DNA  
386 polymerase (Toyobo) according to manufacturer's instruction. DNA sequences of the inverse PCR  
387 products were determined by direct sequencing and primer walking methods.

388 The nucleotide sequence was determined with an ABI PRISM 310 Genetic Analyzer using a BigDye  
389 Terminator v3.1 Cycle Sequencing Kit (Thermo Fisher Scientific). Analysis of nucleotide sequence and  
390 homology searches were performed as described previously (61). Multiple sequence alignment was  
391 produced with the program Clustal W (<http://clustalw.ddbj.nig.ac.jp>).

392 To obtain the hydroquinone-degradation genes, we first attempted to amplify a portion of the gene  
393 encoding the large subunit of the hydroquinone dioxygenase (*hqdA2*) and also a fragment of  
394 4-hydroxymuconic semialdehyde dehydrogenase-encoding gene (*hqdB*). The two sets of degenerate  
395 primers, hqdA2-F and hqdA2-R, and hqdB-F and hqdB-R, respectively (Table 3, were designed from the  
396 conserved peptide sequences, A-W-G-F-F-Y-G at position 77-83 in HapD of *Pseudomonas fluorescens*



397 strain ACB (49), M-P-A-D-I-R-H at position 299-305 in HapD, F-G-G-[MI]-A-D-K at position 112-118  
398 in HpaE, and W-I-N-C-Y-K-R at position 434-440 in HapE, respectively. PCR amplifications and DNA  
399 sequencing were carried out as described above. Inverse-PCRs were employed to obtain the flanking  
400 fragments using the primers listed in Table 3.

401 **Gene disruption.** To disrupt the *dnpC1* gene, a 533-bp DNA fragment containing the internal  
402 region of *dnpC1* was excised from pX-dnpC1 using BamHI restriction sites of the vector that are adjacent  
403 to the inserted fragment, and inserted into vector pK19mob (57). The resulting plasmid, pK19-dnpC1,  
404 was introduced by conjugation from *E. coli* S17-1 into strain KU-46. Transformants were selected on  
405 MSM plate containing 1.0 g/L ammonium nitrate, 0.3% disodium succinate hexahydrate and kanamycin,  
406 and then subjected to PCR analysis to examine insertion of pK19-dnpC1 into the genomic *dnpC1* gene by  
407 single crossover (Fig. S1).

408 **Reverse transcription (RT)-PCR.** Cells of *Paraburkholderia* sp. KU-46 were grown in MSM  
409 medium containing 0.3% succinate and 0.4 mM DNP, NP or NaNO<sub>3</sub> until OD<sub>600</sub> of the culture was 0.3.  
410 Cells were then immediately mixed with RNAProtect Bacteria Reagent (QIAGEN). Total RNA was  
411 isolated using ISOGEN II (Nippon Gene). In order to remove any contaminating genomic DNA, the RNA  
412 samples were incubated with 1 U of deoxyribonuclease (RT Grade) for Heat Stop (Nippon Gene). A  
413 cDNA was obtained by a reverse transcription (RT) reaction using PrimeScript II 1st strand cDNA  
414 Synthesis Kit (Takara Bio) and random primers. The cDNA was used as a template for subsequent PCRs  
415 with specific primers (Table 3). PCR samples were electrophoresed on a 0.8% agarose gel and visualized  
416 by staining with ethidium bromide.

417 **Expression of *dnp* genes in *E. coli*.** The DNA fragment carrying *orf2*, 3 (*dnpAB*) was amplified by  
418 KOD –Plus– Neo DNA polymerase (Toyobo) using the primers shown in Table 3, and the gel-purified  
419 DNA was ligated to the expression vector, pET-22b(+) (Novagen). Similarly, the DNA fragments  
420 carrying *dnpA*, *dnpB*, *orf4* (*dnpC1*), *dnpC2*, and *dnpC1C2* were amplified, and ligated to the expression  
421 vector, pET16b (Novagen) or pET-HAT. The forward primers were designed to contain an NdeI  
422 restriction site with an ATG start codon and the reverse primers contain a EcoRI, XhoI or BamHI  
423 restriction site to facilitate directional cloning in the pET-22b(+), pET-16b or pET-HAT expression  
424 vectors. The resultant plasmids were designated pET-dnpAB, pET-dnpA, pETHAT-dnpA, pET-dnpB,  
425 pET-dnpC1, pET-dnpC2, and pET-dnpC1C2 (Table 2). For protein production, all *E. coli* strains  
426 containing expression plasmid including pET-22b(+), pET-16b and pET-HAT as a negative control were  
427 cultivated in LB medium containing Ap. When the culture reached an OD<sub>600</sub> of 0.4-0.5, temperature of  
428 rotary shaker was shifted to 25°C, and further cultured to until OD of 0.5 to 0.6 in order to shift the  
429 medium temperature to 25°C. At this point (OD<sub>600</sub> of 0.5 to 0.6), rhamnose was added to induce the

430 protein expression at final concentration of 0.05% in the medium and further cultured for 16 hrs. The  
431 resulting cells were harvested by centrifugation, washed twice in 21 mM sodium-potassium phosphate  
432 buffer (pH7.1), and used as whole cells.

433 **Synthesis of H<sup>-</sup>-DNP.** H<sup>-</sup>-DNP was chemically synthesized according to the method of Behrend  
434 and Heesche-Wagner (29) with minor modifications. 1 mmol of DNP was dissolved in 3 ml of dry  
435 acetonitrile and sodium sulfate and heated to 50°C in argon environment for 5 min. At this temperature,  
436 0.8 mmol of sodium borohydride was added over a period of 20 s. The reaction mixture turned red and  
437 further incubated at 50 °C for 3 min. The reaction mixture was cooled on ice, and then an orange red  
438 precipitate formed. The supernatant was removed and the precipitate was washed with 3 ml cold argon  
439 purge acetonitrile.

440 As the chemically synthesized H<sup>-</sup>-DNP contained traces of sodium borohydride and other  
441 by-products, we used *E. coli* whole cells harboring *orf2* (*dnpA*) to prepare the H<sup>-</sup>-DNP substrate and after  
442 cell removal the extract was used for transformation as described below. The molar concentration of  
443 H<sup>-</sup>-DNP was considered as the starting material DNP, since the conversion efficiency was 100%. This  
444 quantification is consistent in relation to the extinction coefficient value of  $\epsilon_{420}=9 \text{ mM}^{-1}\text{cm}^{-1}$  determined  
445 by Behrend and Heesche-Wagner method (29).

446 **Whole cell transformation.** The *E. coli* whole cells were resuspended in 21 mM  
447 sodium-potassium phosphate buffer (pH 7.1) supplemented with 0.4% glucose, adjusted to an OD of 1.0  
448 at 600 nm and incubated with 0.1 mM of DNP or 0.06 mM of H<sup>-</sup>-DNP. Cell suspensions were shaken at  
449 37 °C, and 5-fold dilution of supernatants were analyzed by a spectrophotometer (UV-1800, Shimazu),  
450 and a high-pressure liquid chromatography (HPLC) as described below.

451 **Protein purification.** His<sub>10</sub>-tagged DnpA (H<sub>10</sub>-DnpA), His<sub>10</sub>-tagged DnpB (H<sub>10</sub>-DnpB), and  
452 HAT-tagged DnpA (H-DnpA) were purified from *E. coli* cells overproducing the corresponding proteins.  
453 The whole cells were resuspended in 21 mM sodium-potassium phosphate buffer (pH7.1), and sonicated  
454 by three 40-s bursts with a Braun-Sonifier 250 apparatus. After centrifugation for 30 min at 18,000 X g at  
455 4°C, the supernatant was applied to TALON metal affinity resin (Clontech-TAKARA), according to the  
456 manufacturer's instructions. The column containing the crude cell extracts was washed with wash buffer  
457 containing 50 mM sodium phosphate, pH7.0, 300 mM NaCl and 20 mM imidazole, and the protein was  
458 eluted with an elution buffer containing 50 mM sodium phosphate, pH7.0, 300 mM NaCl, and 120 mM  
459 imidazole. Imidazole and NaCl were removed using a PD-10 gel filtration column (GE Healthcare).  
460 H<sub>10</sub>-DnpA did not bind to TALON metal affinity resin, therefore we constructed pETHAT-dnpA, which  
461 expresses H-DpnA, and purified the H-DpnA protein.



462           **Enzyme assays.** Hydride transferase activity was assayed by monitoring the UV-visible light  
463 absorption spectrum change using a spectrophotometer (UV-1800, Shimazu). Reaction mixtures  
464 contained DNP or PA (0.04  $\mu\text{mol}$ ), NAD(P)H (0.08  $\mu\text{mol}$ ), sodium-potassium phosphate buffer (20  $\mu\text{mol}$ ,  
465 pH7.1), and an appropriate amount of purified enzyme in a final volume 1 ml. Nitrite-eliminating enzyme  
466 was also assayed by monitoring the UV-visible light absorption spectrum change using a  
467 spectrophotometer (UV-1800, Shimazu). Reaction mixtures contained H<sup>-</sup>-DNP (0.05  $\mu\text{mol}$ )  
468 sodium-potassium phosphate buffer (20  $\mu\text{mol}$ , pH7.1), and an appropriate amount of purified enzyme in a  
469 final volume 1 ml.

470           **HPLC analysis.** HPLC analysis was performed on a CAPCELL PAK C18UG120 column (column  
471 size of 4.6 by 250 mm and particle size of 5  $\mu\text{m}$ ; Shiseido) connected to LC-6AD pump and a  
472 SPD-M20A photodiode array detector (Shimadzu). For the analysis of transformation of NP, the mobile  
473 phase consisted of methanol/H<sub>2</sub>O, 1:1 v/v, containing 0.07% perchloric acid at a flow rate 1.0 ml min<sup>-1</sup>.  
474 For the analysis of transformation of DNP and H<sup>-</sup>-DNP, the mobile phase consisted of 50 mM potassium  
475 phosphate (pH 8.0)/methanol, 3:2 v/v, at a flow rate of 1.0 ml min<sup>-1</sup>.

476           **Nucleotide sequence and accession numbers.** The DNA sequences of the gene clusters *dnp* (14.8  
477 kb) and *hqd* (6.8 kb) had been deposited in the DDBJ database under accession numbers LC496529 and  
478 LC496530, respectively.

479

#### 480 **Acknowledgments**

481           We thank Dr. Takaaki Sumiyoshi for synthesis of H<sup>-</sup>-DNP. This work was supported in part by a  
482 Grant-in-Aid from Kansai University for progress of research in a graduate course, 2018.

483

484 **References**

- 485 1. Agency for Toxic Substances and Disease Registry (ATSDR). 1995. Toxicological Profile for  
486 Dinitrophenols. Public Health Service, U.S. Department of Health and Human Services, Atlanta, GA.
- 487 2. Booth, G. 2000. Nitro compounds, aromatic. *in* Ullmann's encyclopedia of industrial chemistry.  
488 Wiley-VCH, Weinheim.
- 489 3. US EPA. 2010. National Pollutant Discharge Elimination System (NPDES) Permit Writers' Manual.  
490 United States Environmental Protection Agency. EPA-833-K-10-001.
- 491 4. Cutting WC, Mehrrens HG, Tainter ML. 1933. Actions and uses of dinitrophenol: Promising metabolic  
492 applications. *J Am Med Assoc* 101:193–195.
- 493 5. Holborow A, Purnell RM, Wong JF. 2016. Beware the yellow slimming pill: fatal 2,4-dinitrophenol  
494 overdose. *BMJ Case Rep* 2016:bcr2016214689. doi:10.1136/bcr-2016-214689.
- 495 6. Grundlingh J, Dargan PI, El-Zanfaly M, Wood DM. 2011. 2,4-dinitrophenol (DNP): a weight loss  
496 agent with significant acute toxicity and risk of death. *J Med Toxicol* 7:205-212.  
497 doi:10.1007/s13181-011-0162-6.
- 498 7. Geisler JG. 2019. 2,4 Dinitrophenol as medicine. *Cells* 8:280. <http://doi.10.3390/cells8030280>.
- 499 8. Arora PK, Srivastava A, Singh VP. 2014. Bacterial degradation of nitrophenols and their derivatives. *J*  
500 *Hazard Mater* 266:42-59. doi:10.1016/j.jhazmat.2013.12.011.
- 501 9. Ju, KS, Parales, RE. 2010. Nitroaromatic compounds, from synthesis to biodegradation. *Microbiol Mol*  
502 *Biol Rev* 74:250-272. doi:10.1128/MMBR.00006-10.
- 503 10. Lenke H, Pieper DH, Bruhn C, Knackmuss HJ. 1992. Degradation of 2,4-dinitrophenol by two  
504 *Rhodococcus erythropolis* strains, HL 24-1 and HL 24-2. *Appl Environ Microbiol* 58:2928-2932.
- 505 11. Blasco R, Moore E, Wray V, Pieper D, Timmis K, Castillo F. 1999. 3-nitroadipate, a metabolic  
506 intermediate for mineralization of 2,4-dinitrophenol by a new strain of a *Rhodococcus* species. *J*  
507 *Bacteriol* 181:149-152.
- 508 12. Ebert S, Fischer P, Knackmuss H-J. 2001. Converging catabolism of 2,4,6-trinitrophenol (picric acid)  
509 and 2,4-dinitrophenol by *Nocardioides simplex* FJ2-1A. *Biodegradation* 12:367-376.  
510 doi:10.1023/A:1014447700775.
- 511 13. Heiss G, Hofmann KW, Trachtmann N, Walters DM, Rouviere P, Knackmuss HJ. 2002. *dnp* gene  
512 functions of *Rhodococcus (opacus) erythropolis* HL PM-1 in the initial steps of 2,4,6-trinitrophenol  
513 degradation. *Microbiology* 148:799-806. doi:10.1099/00221287-148-3-799.
- 514 14. Heiss G, Trachtmann N, Abe Y, Takeo M, Knackmuss HJ. 2003. Homologous *dnpGI* genes in  
515 2,4-dinitrophenol- and 4-nitrophenol-degrading *Rhodococcus* spp. *Appl Environ Microbiol*  
516 69:2748-2754. doi:10.1128/AEM.69.5.2748-2754.2003.

- 517 15. Iwaki H, Abe K, Hasegawa Y. 2007. Isolation and characterization of a new  
518 2,4-dinitrophenol-degrading bacterium *Burkholderia* sp. strain KU-46 and its degradation pathway.  
519 *FEMS Microbiol Lett* 274:112-117. doi:10.1111/j.1574-6968.2007.00816.x.
- 520 16. Lenke H, Knackmuss HJ. 1992. Initial hydrogenation during catabolism of picric acid by  
521 *Rhodococcus erythropolis* HL 24-2. *Appl Environ Microbiol* 58:2933-2937.
- 522 17. Daniels L, Bakhiet N, Harmon K. 1985. Widespread distribution of a 5-deazaflavin cofactor in  
523 *Actinomycetes* and related bacteria. *Syst Appl Microbiol* 6:12-17.
- 524 18. Greening C, Ahmed FH, Mohamed AE, Lee BM, Pandey G, Warden AC, Scott C, Oakeshott JG,  
525 Taylor MC, Jackson CJ. 2016. Physiology, biochemistry, and applications of F<sub>420</sub>- and F<sub>0</sub>-dependent  
526 redox reactions. *Microbiol Mol Biol Rev* 80:451-493. doi:10.1128/MMBR.00070-15.
- 527 19. Purwantini E, Gillis TP, Daniels L. 1997. Presence of F<sub>420</sub>-dependent glucose-6-phosphate  
528 dehydrogenase in *Mycobacterium* and *Nocardia* species, but absence from *Streptomyces* and  
529 *Corynebacterium* species and methanogenic *Archaea*. *FEMS Microbiol Lett* 146:129-134.  
530 doi:10.1111/j.1574-6968.1997.tb10182.x.
- 531 20. Hübner A, Danganan CE, Xun L, Chakrabarty AM, Hendrickson W. 1998. Genes for  
532 2,4,5-trichlorophenoxyacetic acid metabolism in *Burkholderia cepacia* AC1100: characterization of  
533 the *tftC* and *tftD* genes and locations of the *tft* operons on multiple replicons. *Appl Environ Microbiol*  
534 64:2086-2093.
- 535 21. Sánchez MA, González B. 2007. Genetic characterization of 2,4,6-trichlorophenol degradation in  
536 *Cupriavidus necator* JMP134. *Appl Environ Microbiol* 73:2769-2776. doi:10.1128/AEM.02584-06.
- 537 22. Hatta T, Fujii E, Takizawa N. 2012. Analysis of two gene clusters involved in 2,4,6-trichlorophenol  
538 degradation by *Ralstonia pickettii* DTP0602. *Biosci Biotechnol Biochem* 76:892-899.  
539 doi:10.1271/bbb.110843.
- 540 23. Belchik SM and Xun L. 2008. Functions of flavin reductase and quinone reductase in  
541 2,4,6-trichlorophenol degradation by *Cupriavidus necator* JMP134. *J Bacteriol* 190:1615-1619.  
542 doi:10.1128/JB.01697-07.
- 543 24. van Dillewijn P, Wittich RM, Caballero A, Ramos JL. 2008a. Type II hydride transferases from  
544 different microorganisms yield nitrite and diarylamines from polynitroaromatic compounds. *Appl*  
545 *Environ Microbiol* 74:6820-6823. doi:10.1128/AEM.00388-08.
- 546 25. van Dillewijn P, Wittich RM, Caballero A, Ramos JL. 2008b. Subfunctionality of hydride  
547 transferases of the old yellow enzyme family of flavoproteins of *Pseudomonas putida*. *Appl Environ*  
548 *Microbiol* 74:6703-678. doi:10.1128/AEM.00386-08.

- 549 26. Williams RE, Rathbone DA, Scrutton NS, Bruce NC. 2004. Biotransformation of explosives by the  
550 old yellow enzyme family of flavoproteins. *Appl Environ Microbiol* 70:3566-3574.  
551 doi:10.1128/AEM.70.6.3566-3574.2004.
- 552 27. Dutta D, Bhattacharyya S, Das AK. Proteins. 2012. Crystal structure and fluorescence studies reveal  
553 the role of helical dimeric interface of staphylococcal FabG1 in positive cooperativity for NADPH.  
554 80:1250-1257. doi: 10.1002/prot.24024.
- 555 28. Kavanagh KL, Jörnvall H, Persson B, Oppermann U. 2008. The SDR superfamily: functional and  
556 structural diversity within a family of metabolic and regulatory enzymes. *Cell Mol Life Sci*  
557 65:3895-906. doi:10.1007/s00018-008-8588-y.
- 558 29. Behrend C, Heesche-Wagner K. 1999. Formation of hydride-Meisenheimer complexes of picric acid  
559 (2,4,6-trinitrophenol) and 2,4-dinitrophenol during mineralization of picric acid by *Nocardioides* sp.  
560 strain CB 22-2. *Appl Environ Microbiol* 65:1372-1377.
- 561 30. Rieger PG, Sinnwell V, Preuss A, Francke W, Knackmuss HJ. 1999. Hydride-Meisenheimer complex  
562 formation and protonation as key reactions of 2,4,6-trinitrophenol biodegradation by *Rhodococcus*  
563 *erythropolis*. *J Bacteriol* 181:1189-1195.
- 564 31. Persson B, Kallberg Y. 2013. Classification and nomenclature of the superfamily of short-chain  
565 dehydrogenases/reductases (SDRs). *Chem Biol Interact* 202:111-115. doi:10.1016/j.cbi.2012.11.009.
- 566 32. Wang P, Zheng D, Wang Y, Liang R. 2018. One 3-oxoacyl-(acyl-carrier-protein) reductase functions  
567 as 17 $\beta$ -hydroxysteroid dehydrogenase in the estrogen-degrading *Pseudomonas putida* SJTE-1.  
568 *Biochem Biophys Res Commun* 505:910-916. doi:10.1016/j.bbrc.2018.10.005.
- 569 33. Davidson AL, Dassa E, Orelle C, Chen J. 2008. Structure, function, and evolution of bacterial  
570 ATP-binding cassette systems. *Microbiol Mol Biol Rev* 72:317-364. doi:10.1128/MMBR.00031-07.
- 571 34. Parravicini F, Brocca S, Lotti M. 2016. Conformational stability of recombinant desulfurizing  
572 enzymes from a newly isolated *Rhodococcus* sp. *Mol Biotechnol* 58:1-11.  
573 doi:10.1007/s12033-015-9897-7.
- 574 35. Coquille S, Roux C, Fitzpatrick TB, Thore S. 2012. The last piece in the vitamin B1 biosynthesis  
575 puzzle: structural and functional insight into yeast 4-amino-5-hydroxymethyl-2-methylpyrimidine  
576 phosphate (HMP-P) synthase. *J Biol Chem* 287:42333-42343. doi:10.1074/jbc.M112.397240.
- 577 36. Hofmann KW, Knackmuss HJ, Heiss G. 2004. Nitrite elimination and hydrolytic ring cleavage in  
578 2,4,6-trinitrophenol (picric acid) degradation. *Appl Environ Microbiol* 70:2854-2860.  
579 doi:10.1128/AEM.70.5.2854-2860.2004.
- 580 37. Min J, Lu Y, Hu X, Zhou NY. 2016a. Biochemical Characterization of 3-methyl-4-nitrophenol  
581 degradation in *Burkholderia* sp. strain SJ98. *Front Microbiol* 7:791. doi:10.3389/fmicb.2016.00791.

- 582 38. Min J, Zhang JJ, Zhou NY. 2016b. A two-component *para*-nitrophenol monooxygenase initiates a  
583 novel 2-chloro-4-nitrophenol catabolism pathway in *Rhodococcus imtechensis* RKJ300. *Appl*  
584 *Environ Microbiol* 82:714-723. doi:10.1128/AEM.03042-15.
- 585 39. Pimviriyakul P, Chaiyen P. 2018. A complete bioconversion cascade for dehalogenation and  
586 denitration by bacterial flavin-dependent enzymes. *J Biol Chem*. 293:18525-18539.  
587 doi:10.1074/jbc.RA118.005538.
- 588 40. Kitagawa W, Kimura N, Kamagata Y. 2004. A novel *p*-nitrophenol degradation gene cluster from a  
589 gram-positive bacterium, *Rhodococcus opacus* SAO101. *J Bacteriol* 186:4894-4902.  
590 doi:10.1128/JB.186.15.4894-4902.2004.
- 591 41. Perry LL, Zylstra GJ. 2007. Cloning of a gene cluster involved in the catabolism of *p*-nitrophenol by  
592 *Arthrobacter* sp. strain JS443 and characterization of the *p*-nitrophenol monooxygenase. *J Bacteriol*  
593 189:7563-7572. doi:10.1128/JB.01849-06.
- 594 42. Takeo M, Murakami M, Niihara S, Yamamoto K, Nishimura M, Kato D, Negoro S. 2008. Mechanism  
595 of 4-nitrophenol oxidation in *Rhodococcus* sp. strain PN1: characterization of the two-component  
596 4-nitrophenol hydroxylase and regulation of its expression. *J Bacteriol* 190:7367-7374.  
597 doi:10.1128/JB.00742-08.
- 598 43. Yamamoto K, Nishimura M, Kato D, Takeo M, Negoro S. 2011. Identification and characterization of  
599 another 4-nitrophenol degradation gene cluster, *nps*, in *Rhodococcus* sp. strain PN1. *J Biosci Bioeng*  
600 111:687-694. doi:10.1016/j.jbiosc.2011.01.016.
- 601 44. Heine T, van Berkel WJH, Gassner G, van Pée KH, Tischler D. 2018. Two-component  
602 FAD-dependent monooxygenases: current knowledge and biotechnological opportunities. *Biology* 7  
603 pii: E42. doi:10.3390/biology7030042.
- 604 45. Ohtsubo Y, Fujita N, Nagata Y, Tsuda M, Iwasaki T, Hatta T. 2013. Complete genome sequence of  
605 *Ralstonia pickettii* DTP0602, a 2,4,6-trichlorophenol degrader. *Genome Announc* 1 pii: e00903-13.  
606 doi:10.1128/genomeA.00903-13.
- 607 46. Patridge EV, Ferry JG. 2006. WrbA from *Escherichia coli* and *Archaeoglobus fulgidus* is an  
608 NAD(P)H:quinone oxidoreductase. *J Bacteriol* 188:3498-3506.  
609 doi:10.1128/JB.188.10.3498-3506.2006.
- 610 47. Zenno S, Koike H, Kumar AN, Jayaraman R, Tanokura M, Saigo K. 1996. Biochemical  
611 characterization of NfsA, the *Escherichia coli* major nitroreductase exhibiting a high amino acid  
612 sequence homology to Frp, a *Vibrio harveyi* flavin oxidoreductase. *J Bacteriol* 178:4508-4514.

- 613 48. Kadiyala V, Spain JC. 1998. A two-component monooxygenase catalyzes both the hydroxylation of  
614 *p*-nitrophenol and the oxidative release of nitrite from 4-nitrocatechol in *Bacillus sphaericus* JS905.  
615 *Appl Environ Microbiol* 64:2479-2484.
- 616 49. Moonen MJ, Kamerbeek NM, Westphal AH, Boeren SA, Janssen DB, Fraaije MW, van Berkel WJ.  
617 2008. Elucidation of the 4-hydroxyacetophenone catabolic pathway in *Pseudomonas fluorescens* ACB.  
618 *J Bacteriol* 190:5190-5198. doi:10.1128/JB.01944-07.
- 619 50. Min J, Zhang JJ, Zhou NY. 2014. The gene cluster for *para*-nitrophenol catabolism is responsible for  
620 2-chloro-4-nitrophenol degradation in *Burkholderia* sp. strain SJ98. *Appl Environ Microbiol*  
621 80:6212-6222. doi:10.1128/AEM.02093-14.
- 622 51. Shen W, Liu W, Zhang J, Tao J, Deng H, Cao H, Cui Z. 2010. Cloning and characterization of a gene  
623 cluster involved in the catabolism of *p*-nitrophenol from *Pseudomonas putida* DLL-E4. *Bioresour*  
624 *Technol* 101:7516-7522. doi:10.1016/j.biortech.2010.04.052.
- 625 52. Takeo M, Yamamoto K, Sonoyama M, Miyanaga K, Kanbara N, Honda K, Kato DI, Negoro S. 2018.  
626 Characterization of the 3-methyl-4-nitrophenol degradation pathway and genes of *Pseudomonas* sp.  
627 strain TSN1. *J Biosci Bioeng* 126:355-362. doi:10.1016/j.jbiosc.2018.04.001.
- 628 53. Wei Q, Liu H, Zhang JJ, Wang SH, Xiao Y, Zhou NY. 2010. Characterization of a *para*-nitrophenol  
629 catabolic cluster in *Pseudomonas* sp. strain NyZ402 and construction of an engineered strain capable  
630 of simultaneously mineralizing both *para*- and *ortho*-nitrophenols. *Biodegradation* 21:575-584.  
631 doi:10.1007/s10532-009-9325-4.
- 632 54. Zhang JJ, Liu H, Xiao Y, Zhang XE, Zhou NY. 2009. Identification and characterization of catabolic  
633 *para*-nitrophenol 4-monooxygenase and *para*-benzoquinone reductase from *Pseudomonas* sp. strain  
634 WBC-3. *J Bacteriol* 191:2703-2710. doi:10.1128/JB.01566-08.
- 635 55. Simon, R., U. Priefer, and A. Pühler. 1983. A broad host range mobilization system for in vivo  
636 genetic engineering: transposon mutagenesis in Gram-negative bacteria. *Bio/Technology* 1:784-791.  
637 doi:10.1038/nbt1183-784.
- 638 56. Cha J, Bishai W, Chandrasegaran S. 1993. New vectors for direct cloning of PCR products. *Gene*  
639 136: 369-370.
- 640 57. Schäfer A, Tauch A, Jäger W, Kalinowski J, Thierbach G, Pühler A. 1994. Small mobilizable  
641 multi-purpose cloning vectors derived from the *Escherichia coli* plasmids pK18 and pK19: selection  
642 of defined deletions in the chromosome of *Corynebacterium glutamicum*. *Gene* 145:69-73.  
643 doi:10.1016/0378-1119(94)90324-7.
- 644 58. Miller JH. 1972. Experiments in Molecular Genetics. Cold Spring Harbor Laboratory, Cold Spring  
645 Harbor, New York, 433.

- 646 59. Louie TM, Webster CM, Xun L. 2002. Genetic and biochemical characterization of a  
647 2,4,6-trichlorophenol degradation pathway in *Ralstonia eutropha* JMP134. *J Bacteriol* 184:3492-3500.  
648 doi:10.1128/JB.184.13.3492-3500.2002.
- 649 60. Nordin K, Unell M, Jansson JK. 2005. Novel 4-chlorophenol degradation gene cluster and  
650 degradation route via hydroxyquinol in *Arthrobacter chlorophenolicus* A6. *Appl Environ Microbiol*  
651 71:6538-6544. doi:10.1128/AEM.71.11.6538-6544.2005.
- 652 61. Iwaki H, Wang S, Grosse S, Bergeron H, Nagahashi A, Lertvorachon J, Yang J, Konishi Y,  
653 Hasegawa Y, Lau PC. 2006. Pseudomonad cyclopentadecanone monooxygenase displaying an  
654 uncommon spectrum of Baeyer-Villiger oxidations of cyclic ketones. *Appl Environ Microbiol*  
655 72:2707-2720. doi:10.1128/AEM.72.4.2707-2720.2006.



656 **Legends**

657 Fig. 1. (A) Proposed degradation pathways for 2,4-dinitrophenol (DNP) and 4-nitrocatechol in  
658 *Paraburkholderia* sp. strain KU-46, and assignment of the *dnp* gene products to the pathways. For  
659 comparison, the commonly known pathway in *Actinobacteria* is shown which does not form  
660 nitrophenol as an intermediate. (B) Organization of the *dnp* gene cluster in strain KU-46. See Table  
661 1 for sequence homology searches. The five solid lines (numbered 1 to 5) indicate the size in  
662 basepairs of the RT-PCR-amplified regions. (C) Total RNA from strain KU-46 cells grown on MSM  
663 medium containing 0.3% succinate and 0.4 mM DNP, NP or NaNO<sub>3</sub> (-) were used templates. Lane 1,  
664 *npdC2* internal region; lane 2, *dnpA* internal region; lane 3, *dnpB* internal region; lane 4, *orf13*  
665 internal region; lane 5, *dnpA-dnpB* intergenic region. (D) Organization of hydroquinone-degradation  
666 gene locus in strain KU-46. *hqdA1, A2, B, C, D* and *orf14, 15* and *16* are described in Table 1.

667

668 Fig. 2. Functional analysis of *dnpC1* and *dnpC2* genes. A) Spectrophotometric changes during the  
669 transformation of NP by whole cells of *E. coli* harboring *dnpC1C2* (pET-dnpC1C2). Decrease in  
670 spectral absorption at 400 nm correspond to depletion of NP in a time dependent manner. Spectra  
671 were recorded every 5 min. B) Spectrophotometric change was not observed during the  
672 transformation of NP by whole cells of *E. coli* harboring *dnpC1* (pET-dnpC1), indicating DnpC1  
673 lacked NP transformation activity. Spectra were recorded at 0 and 30 min. C) Spectrophotometric  
674 change during the transformation of NP by whole cells of *E. coli* harboring *dnpC2* (pET-dnpC2),  
675 indicating partial transformation of NP by DnpC2. Spectra were recorded at 0 and 30 min. D)  
676 Spectrophotometric changes during the transformation of 4-nitrocatechol by whole cells of *E. coli*  
677 harboring *dnpC1C2* (pET-dnpC1C2). Decrease in spectral absorption at 426 nm corresponds to  
678 depletion of 4-nitrocatechol in a time dependent manner. Spectra were recorded every 5 min.

679

680 Fig. 3. Functional analysis of *dnpAB* genes. A) Spectrophotometric changes during the transformation of  
681 DNP by whole cells of *E. coli* harboring *dnpAB* (pET-dnpAB). Spectra were recorded before the  
682 addition of cells and after 10, 20, 30 and 40 min. B) Spectrophotometric change during the  
683 transformation of DNP by whole cells of *E. coli* harboring *dnpA* alone (pET-dnpA). Spectra were



684 recorded before the addition of cells and after 1, 2, and 3 hrs. The arrows indicate the direction of  
685 spectral changes. C) Spectrophotometric change during the transformation of H<sup>-</sup>-DNP by whole  
686 cells of *E. coli* harboring *dnpB* alone (pET-dnpB). Dashed line, initial spectrum of H<sup>-</sup>-DNP; the  
687 solid line, the final spectrum of the transformation product. Dashed line, initial spectrum of DNP;  
688 the solid line, the final spectrum of the transformation product.

689

690 Fig. 4. Spectrophotometric changes during the transformation of PA by whole cells of *E. coli* harboring  
691 *dnpAB* (pET-dnpAB). The arrows indicate the direction of spectral changes. Spectra were recorded  
692 before the addition of cells and after 1, 2, 3 and 4 hrs.

693

694 Fig. 5. Spectrophotometric change during the transformation of DNP by purified H-DnpA. Sample and  
695 reference cuvettes contained NADPH (0.08 μmol), sodium-potassium phosphate buffer (20 μmol,  
696 pH 7.1), and 1 μg H-DnpA in a 1 ml volume. The sample cuvette also contained 0.04 μmol of DNP.  
697 The arrows indicate the direction of spectral changes.

698

699 Fig. 6. Spectrophotometric change during the transformation of H<sup>-</sup>-DNP by purified H<sub>10</sub>-DnpB. Sample  
700 and reference cuvettes contained sodium-potassium phosphate buffer (20 μmol, pH 7.1), and 1.0 μg  
701 H<sub>10</sub>-DnpB in a 1 ml volume. The sample cuvette also contained 0.05 μmol of H<sup>-</sup>-DNP. The arrows  
702 indicate the direction of spectral changes.

703

704 Fig. 7. Spectrophotometric changes during the transformation of PA by purified H-DnpA and H<sub>10</sub>-DnpB.  
705 The spectra were recorded every 2 minutes. The arrows indicate the direction of spectral changes.  
706 A) Spectrophotometric change during the transformation of PA by purified H-DnpA. Sample and  
707 reference cuvettes contained NADPH (0.08 μmol), sodium-potassium phosphate buffer (20 μmol,  
708 pH 7.1), and 1 μg H-DnpA in a 1 ml volume. The sample cuvette also contained 0.04 μmol of PA.  
709 The arrows indicate the direction of spectral changes. Time-dependent shifts of absorption maxima  
710 of UV-visible light absorption spectra with two steps were observed. The shift of absorption maxima  
711 from 355 nm to 420 nm was observed from 0 to 18 min, and the shift of absorption maxima from  
712 420 nm to 400 nm was observed after 18min. B) Spectrophotometric change from 0 to 18 min of

713 panel A. C) Spectrophotometric change after 18 min of panel A. D) Spectrophotometric change  
714 during the transformation of the product of panel A by purified H<sub>10</sub>-DnpB. Time-dependent shifts of  
715 absorption maxima of UV-visible light absorption spectra with two steps were observed. A  
716 bathochromic shift and a formation of second absorption maxima at 306 nm were observed from 0  
717 to 16 min, and decrease in spectral absorption at 306 nm and a hypsochromic shift were observed  
718 after 16 min. E) Spectrophotometric change from 0 to 16 min of panel D. F) Spectrophotometric  
719 change after 16 min of panel D. Spectrophotometric change from 0 to 16 min of panel D.

720

721 Fig. 8. Proposed reaction sequence of NP and DNP formation from PA by DnpA and DnpB.

722

723 Fig. 9. Known 4-NP degradation pathways. Black arrows indicate DpdC1C2 reaction, and gray arrows  
724 indicate the reactions presumed with DNA sequence of strain KU-46. Open arrows indicate the  
725 pathway from *Rhodococcus* spp., and the two reactions that have not been supported by biochemical  
726 results are indicated by the arrows in parentheses.

727

728 TABLE 1. BLAST homology search results for deduced amino acid sequences

| Gene                            | Most similar gene products (organism) <sup>a</sup>                                                                                                                                                                                                                 | % identity           | score (bits)      | E value                 | Accession no.                    |
|---------------------------------|--------------------------------------------------------------------------------------------------------------------------------------------------------------------------------------------------------------------------------------------------------------------|----------------------|-------------------|-------------------------|----------------------------------|
| <i>orf1</i>                     | TcpY, Unknown function in 2,4,6-trichlorophenol degradation ( <i>Cupriavidus pinatubonensis</i> JMP134)                                                                                                                                                            | 45.6                 | 264               | 8e-84                   | AAZ60954                         |
| <i>orf2</i><br>( <i>dnpA</i> )  | WQE_07512, short-chain dehydrogenase/reductase SDR ( <i>Paraburkholderia terrae</i> BS001)                                                                                                                                                                         | 99.6                 | 492               | 5e-176                  | EIN01638                         |
| <i>orf3</i><br>( <i>dnpB</i> )  | WQE_07507, nitrate ABC transporter substrate-binding protein ( <i>Paraburkholderia terrae</i> BS001)                                                                                                                                                               | 99.0                 | 577               | 0.0                     | EIN01637                         |
| <i>orf4</i><br>( <i>dnpC1</i> ) | HadX, FAD reductase ( <i>Ralstonia pickettii</i> DTP0602)<br>TftC, FAD reductase ( <i>Burkholderia cepacia</i> AC1100)<br>TcpX, FAD reductase ( <i>Ralstonia eutropha</i> JMP134)                                                                                  | 57.8<br>57.8<br>51.4 | 209<br>204<br>200 | 3e-66<br>2e-64<br>2e-62 | BAM65765<br>AAC23547<br>AAZ60950 |
| <i>dnpC2</i>                    | TcpA, 2,4,6-trichlorophenol monooxygenase ( <i>Cupriavidus pinatubonensis</i> JMP134)<br>HadA, 2,4,6-trichlorophenol monooxygenase ( <i>Ralstonia pickettii</i> DTP0602)                                                                                           | 86.1<br>85.7         | 964<br>955        | 0.0<br>0.0              | AAM55214<br>BAL41659             |
| <i>orf5</i><br>( <i>dnpD</i> )  | TcpB, quinone reductase ( <i>Cupriavidus pinatubonensis</i> JMP134)<br>HadB, probable electron transfer protein ( <i>Ralstonia pickettii</i> DTP0602)                                                                                                              | 70.3<br>68.3         | 307<br>282        | 2e-104<br>8e-95         | AAZ60952<br>BAM65763             |
| <i>orf6</i>                     | Reut_A1582, Probable FMN adenyltransferase ( <i>Ralstonia eutropha</i> JMP134)<br>ORF1, Probable FMN adenyltransferase ( <i>Ralstonia pickettii</i> DTP0602)                                                                                                       | 45.6<br>48.8         | 233<br>233        | 1e-72<br>2e-72          | AAZ60948<br>BAL41656             |
| <i>orf7</i><br>( <i>dnpF</i> )  | TcpD, maleylacetate reductase ( <i>Cupriavidus pinatubonensis</i> JMP134)<br>HadD, maleylacetate reductase ( <i>Ralstonia pickettii</i> DTP0602)                                                                                                                   | 65.3<br>64.5         | 484<br>448        | 4e-169<br>4e-15         | AAZ60955<br>BAL41322             |
| <i>orf8</i><br>( <i>dnpE</i> )  | HadC, 6-chlorohydroxyquinol-1,2-dioxygenase ( <i>Ralstonia pickettii</i> DTP0602)<br>TcpC, 6-chlorohydroxyquinol-1,2-dioxygenase ( <i>Cupriavidus pinatubonensis</i> JMP134)                                                                                       | 69.5<br>68.6         | 402<br>398        | 1e-139<br>5e-138        | AGW92783<br>AAM55216             |
| <i>orf9</i><br>( <i>dnpR</i> )  | HadR, LysR family transcriptional regulator for 2,4,6-trichlorophenol catabolic operon ( <i>Ralstonia pickettii</i> DTP0602)<br>TcpR, LysR family transcriptional regulator for 2,4,6-trichlorophenol catabolic operon ( <i>Cupriavidus pinatubonensis</i> JMP134) | 64.4<br>65.7         | 428<br>417        | 1e-148<br>4e-144        | BAM71407<br>AAZ60949             |
| <i>orf10</i>                    | No significant similarity found                                                                                                                                                                                                                                    |                      |                   |                         |                                  |
| <i>orf11</i>                    | WQE_07462, AraC family transcriptional regulator ( <i>Paraburkholderia terrae</i> BS001)                                                                                                                                                                           | 98.6                 | 704               | 0.0                     | EIN01628                         |
| <i>orf12</i>                    | WQE_07457, LysR family transcriptional regulator ( <i>Paraburkholderia terrae</i> BS001)                                                                                                                                                                           | 98.0                 | 617               | 0.0                     | EIN01627                         |
| <i>orf13</i>                    | WQE_07452, NADH:flavin oxidoreductase ( <i>Paraburkholderia terrae</i> BS001)                                                                                                                                                                                      | 95.1                 | 553               | 0.0                     | EIN01626                         |
| <i>orf14</i>                    | PnpR, LysR-type transcriptional regulator controlling the expression of PNP catabolic operons ( <i>Pseudomonas</i> sp. WBC-3)                                                                                                                                      | 57.8                 | 103               | 1e-24                   | AIV98010                         |
| <i>hqdA1</i>                    | PnpE2, hydroquinone dioxygenase small subunit ( <i>Burkholderia</i> sp. SJ98)                                                                                                                                                                                      | 79.8                 | 271               | 3e-91                   | AFR33818                         |
| <i>hqdA2</i>                    | PnpE1, hydroquinone dioxygenase large subunit ( <i>Burkholderia</i> sp. SJ98)                                                                                                                                                                                      | 92.0                 | 635               | 0.0                     | AFR33817                         |
| <i>hqdB</i>                     | PnpD, 4-hydroxymuconic semialdehyde dehydrogenase ( <i>Burkholderia</i> sp. SJ98)                                                                                                                                                                                  | 90.1                 | 923               | 0.0                     | EKS70308                         |
| <i>hqdD</i>                     | PnpF, maleylacetate reductase ( <i>Burkholderia</i> sp. SJ98)                                                                                                                                                                                                      | 84.6                 | 608               | 0.0                     | EKS70307                         |
| <i>hqdC</i>                     | PnpC, hydroxyquinol-1,2-dioxygenase ( <i>Burkholderia</i> sp. SJ98)                                                                                                                                                                                                | 79.3                 | 485               | 9e-172                  | EKS70306                         |

|              |                                                                                                       |      |     |       |          |
|--------------|-------------------------------------------------------------------------------------------------------|------|-----|-------|----------|
| <i>orf15</i> | Orf5, 4-nitrocatechol monooxygenase ferridoxin protein ( <i>Burkholderia</i> sp. SJ98)                | 62.4 | 149 | 2e-44 | EKS70305 |
| <i>orf16</i> | SAMN04487926_104331, ABC-2 type transport system ATP-binding protein ( <i>Burkholderia</i> sp. yr281) | 98.5 | 532 | 0.0   | SDH41711 |

---

729 <sup>a</sup>The genes in functionally uncharacterized gene cluster are not considered here, except for *orf1-3*, *orf10-13*, and

730 *orf16*.

731

732

733 TABLE 2. Bacterial strains and plasmids used in this study

| Strain or plasmid           | Relevant characteristic(s)                                                                                                                                                                                                                                                                                                                                                                                         | Source or reference |
|-----------------------------|--------------------------------------------------------------------------------------------------------------------------------------------------------------------------------------------------------------------------------------------------------------------------------------------------------------------------------------------------------------------------------------------------------------------|---------------------|
| <b>Strains</b>              |                                                                                                                                                                                                                                                                                                                                                                                                                    |                     |
| <i>Paraburkholderia</i> sp. |                                                                                                                                                                                                                                                                                                                                                                                                                    |                     |
| KU-46                       | Wild type, grows on DNP, NP                                                                                                                                                                                                                                                                                                                                                                                        | 15                  |
| KU-46C2M                    | <i>dnpC2</i> mutant of strain KU-46                                                                                                                                                                                                                                                                                                                                                                                | This study          |
| <i>E. coli</i>              |                                                                                                                                                                                                                                                                                                                                                                                                                    |                     |
| KRX                         | [F <sup>+</sup> , <i>traD36</i> , $\Delta ompP$ , <i>proA</i> <sup>+</sup> B <sup>+</sup> , <i>lacIq</i> , $\Delta(lacZ)M15$ ] $\Delta ompT$ , <i>endA1</i> , <i>recA1</i> , <i>gyrA96</i> (Nal <sup>r</sup> ), <i>thi-1</i> , <i>hsdR17</i> (rk <sup>-</sup> , mk <sup>-</sup> ), e14 <sup>-</sup> (MerA <sup>-</sup> ), <i>relA1</i> , <i>supE44</i> , $\Delta(lac-proAB)$ , $\Delta(rhaBAD)::T7$ RNA polymerase | Promega             |
| S-17-1                      | <i>recA pro thi hsdR</i> RP4-2-Tc::Mu-Km::Tn7 Tra <sup>+</sup> Tp <sup>r</sup> Sm <sup>r</sup>                                                                                                                                                                                                                                                                                                                     | 55                  |
| <b>Plasmids</b>             |                                                                                                                                                                                                                                                                                                                                                                                                                    |                     |
| pXcmKn12                    | T/A cloning vector, pUC ori, Ap <sup>r</sup> , Km <sup>r</sup>                                                                                                                                                                                                                                                                                                                                                     | 56                  |
| pK19mob                     | Mobilizable cloning vector, oriT, Km <sup>r</sup>                                                                                                                                                                                                                                                                                                                                                                  | 57                  |
| pET-16b                     | Expression vector with T7 promoter, ColE1 ori, Ap <sup>r</sup>                                                                                                                                                                                                                                                                                                                                                     | Novagen             |
| pET-22b(+)                  | Expression vector with T7 promoter, ColE1 ori, Ap <sup>r</sup>                                                                                                                                                                                                                                                                                                                                                     | Novagen             |
| pET-HAT                     | pET-16b based HAT-tag vector                                                                                                                                                                                                                                                                                                                                                                                       | This study          |
| pX-dnpC1                    | pXcmKn12 derivative carrying a 0.5-kb PCR product containing the internal region of <i>dnpC1</i> from strain KU-46                                                                                                                                                                                                                                                                                                 | This study          |
| pK19-dnpC1                  | pK19mob derivative carrying a 0.5-kb <i>Bam</i> HI fragment containing the internal region of <i>dnpC1</i> from pX-dnpC1                                                                                                                                                                                                                                                                                           | This study          |
| pET-dnpAB                   | pET22b derivative carrying the <i>dnpAB</i> ( <i>orf2orf3</i> )                                                                                                                                                                                                                                                                                                                                                    | This study          |
| pET-dnpA                    | pET-16b derivative carrying the <i>orf2/dnpA</i>                                                                                                                                                                                                                                                                                                                                                                   | This study          |
| pET-dnpB                    | pET-16b derivative carrying the <i>orf3/dnpB</i>                                                                                                                                                                                                                                                                                                                                                                   | This study          |
| pETHAT-dnpA                 | pET-HAT derivative carrying the <i>dnpA</i>                                                                                                                                                                                                                                                                                                                                                                        | This study          |
| pET-dnpC1                   | pET-16b derivative carrying the <i>orf4/dnpC1</i>                                                                                                                                                                                                                                                                                                                                                                  | This study          |
| pET-dnpC2                   | pET-16b derivative carrying the <i>dnpC2</i>                                                                                                                                                                                                                                                                                                                                                                       | This study          |
| pET-dnpC2C1                 | pET-16b derivative carrying the <i>dnpC2C1</i>                                                                                                                                                                                                                                                                                                                                                                     | This study          |

734

735 TABLE 3. Primers used in this study

| Primer                   | Sequence (5' → 3') <sup>a</sup>                                                    | Purpose                                                                         |
|--------------------------|------------------------------------------------------------------------------------|---------------------------------------------------------------------------------|
| TC-FDM-F<br>TC-FDM-R     | GGNAAAYCCiRANCAyGCiAA<br>GGNGTiCCRITRAAiTTYTCRAA                                   | Initial amplification of the DNP-degrading genes                                |
| DNP-inv1-F<br>DNP-inv1-R | GCCAGCGAAGACCAATGGAACGACGCAACG<br>GCTCGGTGATCAGTACGGCCAGTCTGCCA                    | Inverse PCR amplification of <i>dnp</i> genes                                   |
| DNP-inv2-F<br>DNP-inv2-R | GCGACGTCCTCGGGTTATCGATGCTAACGG<br>TTCGTCGAGTTGCGCATGTTGTCTCTCA                     | Inverse PCR amplification of <i>dnp</i> genes                                   |
| DNP-inv3-F<br>DNP-inv3-R | CAATTCGTCGATCCGCAAATGGACC<br>TTGAAGCGGCTGGGCAAAATTCTCT                             | Inverse PCR for <i>dnp</i> genes                                                |
| DNP-inv4-F<br>DNP-inv4-R | CCGAATGTGGAGTTCAGTGCTCGTG<br>CGTAGTTCGGCTGCATCGAGTAGTAGTG                          | Inverse PCR amplification of <i>dnp</i> genes                                   |
| hqdA2-F<br>hqdA2-R       | GCYTGGGGYTTCTTCTACGG<br>TGSCGGATRTCSGCSGGCAT                                       | Amplification of a partial gene encoding hydroquinone dioxygenase large subunit |
| hqdB-F<br>hqdB-R         | TTCGGCGGSATSGCCGACAA<br>CGCTTGTAGCARTTGATCCA                                       | Amplification of a partial gene 4-hydroxymuconic semialdehyde dehydrogenase     |
| hqd-inv1-F<br>hqd-inv1-R | GAAGAAACGGGTTCCGCATTCGGCGCGAAG<br>CTTCGTTGACCCAGTCCCGAGAATCGCCT                    | Inverse PCR amplification of <i>hqd</i> genes                                   |
| hqd-inv2-F<br>hqd-inv2-R | AAGCGCTCGCCATTGCGAACGGCAC<br>CGCATTGTCCGGCGACTTGCCGCC                              | Inverse PCR amplification of <i>hqd</i> genes                                   |
| dnpC1-F<br>dnpC1-R       | GGAATTC <u>CATATG</u> CTAGCAAGCAGAAAACCC<br>CGGGATCC <u>TTAAAGTGT</u> TGCGGGTGGG   | Amplification of <i>dnpC1</i> gene for expression                               |
| dnpC2-F<br>dnpC2-R       | GGAATTC <u>CATATG</u> ATCCGAACCGTCTGCA<br>CC <u>TCGAGTCAGATGGCCATTGT</u> CCGC      | Amplification of <i>dnpC2</i> gene for expression                               |
| orf2-F<br>orf2-R         | GGAATTC <u>CATATG</u> GCAGTCGCGCTGATCACG<br>CGCGGATCC <u>ATTCATTCCAAAGCC</u> ACCG  | Amplification of <i>orf2</i> ( <i>dnpA</i> ) gene for expression                |
| orf3-F<br>orf3-R         | GGAATTC <u>CATATG</u> CTCTCGATTGACCTCACTTATG<br>CCGCTCGAGATTATAAGGTCGACAGATACATCTG | Amplification of <i>orf3</i> ( <i>dnpB</i> ) gene for expression                |
| RTC2-F<br>RTC2-R         | CCGCAACGTGTGTTCGATTG<br>CGAATCACACGGCGGATCTG                                       | Amplification of 443 bp of <i>dnpC1</i> internal region by RT-PCR               |
| RTorf2-F<br>RTorf2-R     | TCGATGACTCTGGCCCAACA<br>ATTGGCGGTGATGCCGTTAG                                       | Amplification of 483 bp of <i>orf2</i> internal region by RT-PCR                |
| RTorf3-F<br>RTorf3-R     | GCCGGAGCAACCATTGGTCT<br>ATCGTCTTGAGCGCCCGTTT                                       | Amplification of 500 bp of <i>orf3</i> internal region by RT-PCR                |
| RTorf13-F<br>RTorf13-R   | TCTCCAGGGCATGGCTCTCA<br>ACGCCGTCGAAACCTGCTTC                                       | Amplification of 501 bp of <i>orf13</i> internal region by RT-PCR               |

736 <sup>a</sup>Specified restriction sites are underlined.



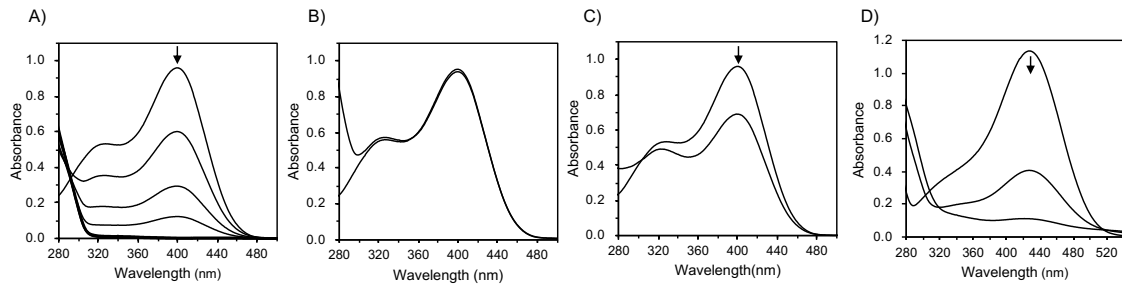

749

750 Fig. 2. Functional analysis of *dnpC1* and *dnpC2* genes. A) Spectrophotometric changes during the  
751 transformation of NP by whole cells of *E. coli* harboring *dnpC1C2* (pET-dnpC1C2). Decrease in  
752 spectral absorption at 400 nm correspond to depletion of NP in a time dependent manner. Spectra  
753 were recorded every 5 min. B) Spectrophotometric change was not observed during the  
754 transformation of NP by whole cells of *E. coli* harboring *dnpC1* (pET-dnpC1), indicating DnpC1  
755 lacked NP transformation activity. Spectra were recorded at 0 and 30 min. C) Spectrophotometric  
756 change during the transformation of NP by whole cells of *E. coli* harboring *dnpC2* (pET-dnpC2),  
757 indicating partial transformation of NP by DnpC2. Spectra were recorded at 0 and 30 min. D)  
758 Spectrophotometric changes during the transformation of 4-nitrocatechol by whole cells of *E. coli*  
759 harboring *dnpC1C2* (pET-dnpC1C2). Decrease in spectral absorption at 426 nm corresponds to  
760 depletion of 4-nitrocatechol in a time dependent manner. Spectra were recorded every 5 min.



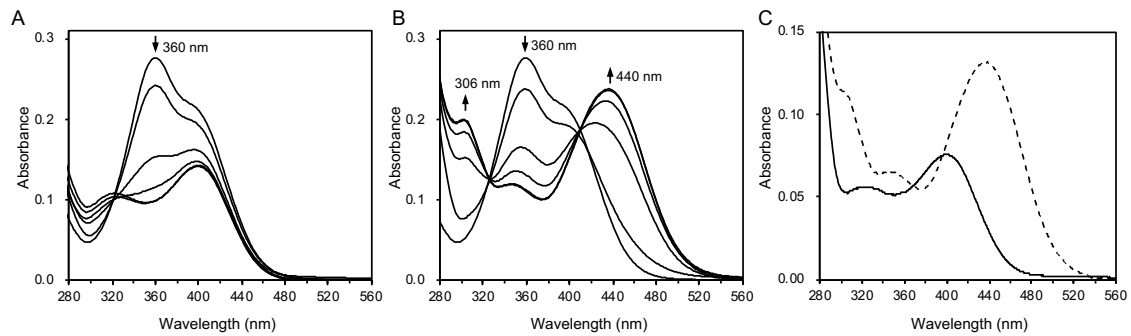

761

762 Fig. 3. Functional analysis of *dnpAB* genes. A) Spectrophotometric changes during the transformation of  
763 DNP by whole cells of *E. coli* harboring *dnpAB* (pET-dnpAB). Spectra were recorded before the  
764 addition of cells and after 10, 20, 30 and 40 min. B) Spectrophotometric change during the  
765 transformation of DNP by whole cells of *E. coli* harboring *dnpA* alone (pET-dnpA). Spectra were  
766 recorded before the addition of cells and after 1, 2, and 3 hrs. The arrows indicate the direction of  
767 spectral changes. C) Spectrophotometric change during the transformation of H-DNP by whole  
768 cells of *E. coli* harboring *dnpB* alone (pET-dnpB). Dashed line, initial spectrum of H-DNP; the  
769 solid line, the final spectrum of the transformation product. Dashed line, initial spectrum of DNP;  
770 the solid line, the final spectrum of the transformation product.

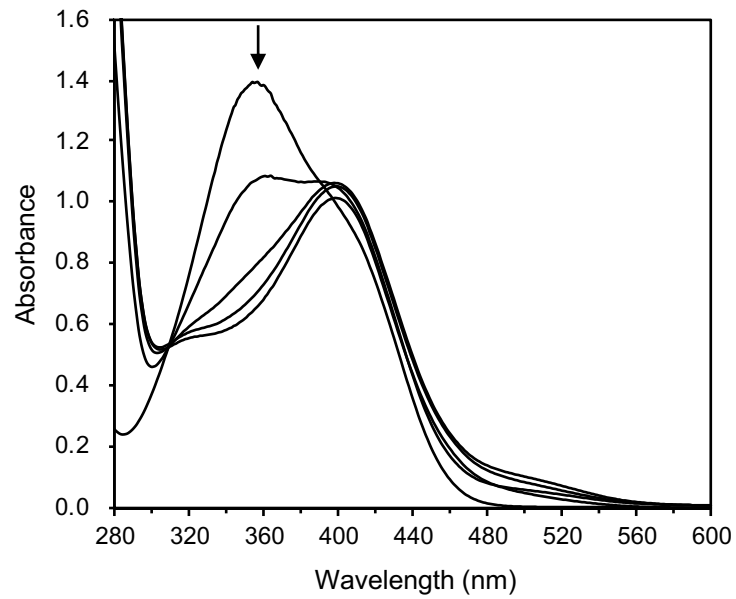

771

772

773 Fig. 4. Spectrophotometric changes during the transformation of PA by whole cells of *E. coli* harboring  
774 *dnpAB* (pET-dnpAB). The arrows indicate the direction of spectral changes. Spectra were recorded  
775 before the addition of cells and after 1, 2, 3 and 4 hrs.

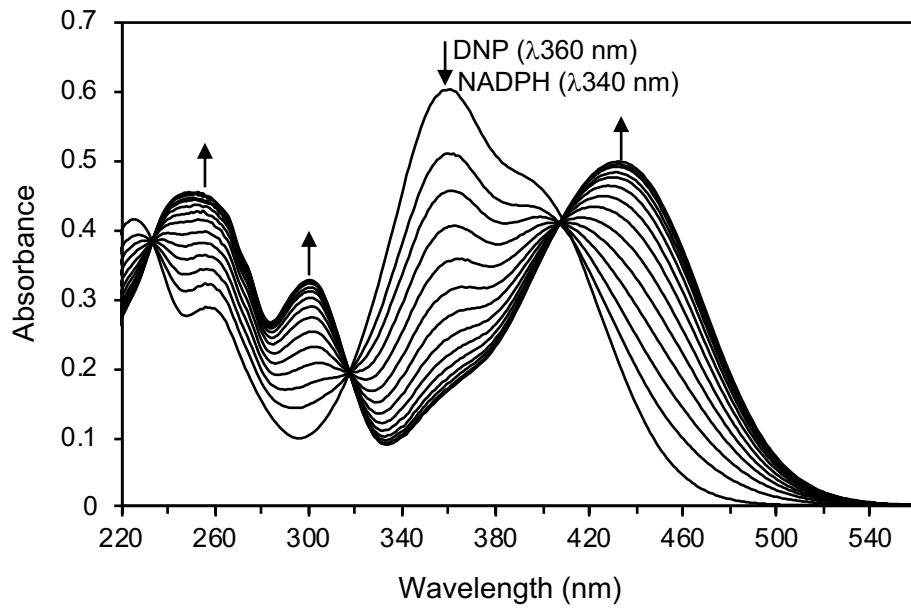

776

777 Fig. 5. Spectrophotometric change during the transformation of DNP by purified H-DnpA. Sample and  
778 reference cuvettes contained NADPH (0.08  $\mu$ mol), sodium-potassium phosphate buffer (20  $\mu$ mol,  
779 pH 7.1), and 1  $\mu$ g H-DnpA in a 1 ml volume. The sample cuvette also contained 0.04  $\mu$ mol of DNP.  
780 The arrows indicate the direction of spectral changes.

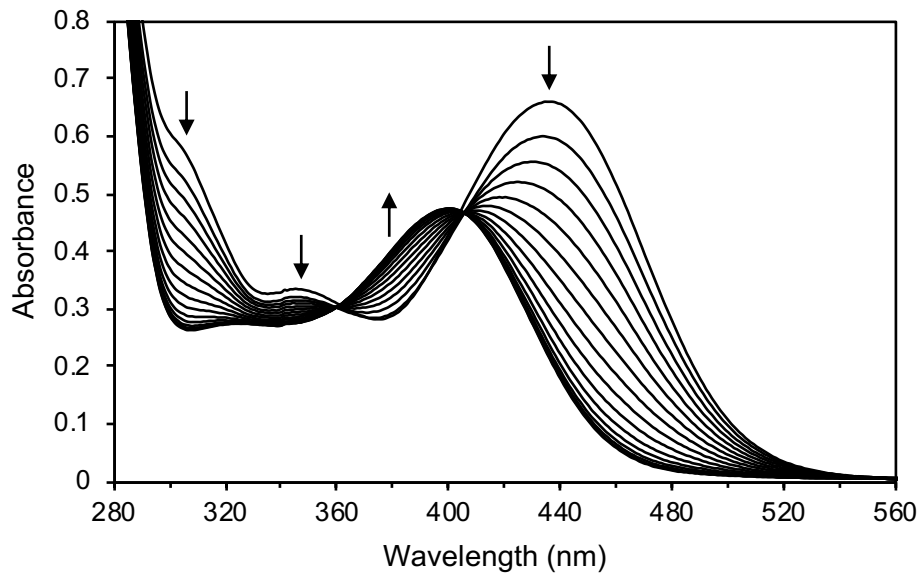

781

782 Fig. 6. Spectrophotometric change during the transformation of H-DNP by purified H<sub>10</sub>-DnpB. Sample  
783 and reference cuvettes contained sodium-potassium phosphate buffer (20  $\mu$ mol, pH 7.1), and 1.0  $\mu$ g  
784 H<sub>10</sub>-DnpB in a 1 ml volume. The sample cuvette also contained 0.05  $\mu$ mol of H-DNP. The arrows  
785 indicate the direction of spectral changes.

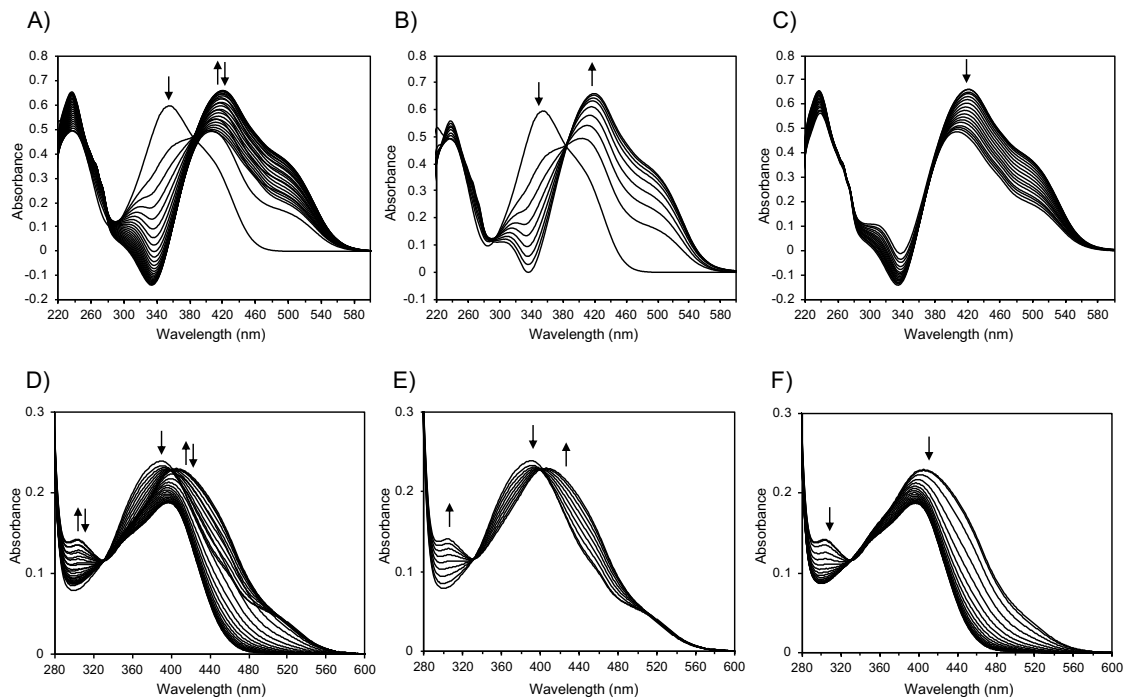

786

787

788 Fig. 7. Spectrophotometric changes during the transformation of PA by purified H-DnpA and H<sub>10</sub>-DnpB.

789 The spectra were recorded every 2 minutes. The arrows indicate the direction of spectral changes.

790 A) Spectrophotometric change during the transformation of PA by purified H-DnpA. Sample and

791 reference cuvettes contained NADPH (0.08  $\mu$ mol), sodium-potassium phosphate buffer (20  $\mu$ mol,

792 pH 7.1), and 1  $\mu$ g H-DnpA in a 1 ml volume. The sample cuvette also contained 0.04  $\mu$ mol of PA.

793 The arrows indicate the direction of spectral changes. Time-dependent shifts of absorption maxima

794 of UV-visible light absorption spectra with two steps were observed. The shift of absorption maxima

795 from 355 nm to 420 nm was observed from 0 to 18 min, and the shift of absorption maxima from

796 420 nm to 400 nm was observed after 18min. B) Spectrophotometric change from 0 to 18 min of

797 panel A. C) Spectrophotometric change after 18 min of panel A. D) Spectrophotometric change

798 during the transformation of the product of panel A by purified H<sub>10</sub>-DnpB. Time-dependent shifts of

799 absorption maxima of UV-visible light absorption spectra with two steps were observed. A

800 bathochromic shift and a formation of second absorption maxima at 306 nm were observed from 0

801 to 16 min, and decrease in spectral absorption at 306 nm and a hypsochromic shift were observed

802 after 16 min. E) Spectrophotometric change from 0 to 16 min of panel D. F) Spectrophotometric

803 change after 16 min of panel D. Spectrophotometric change from 0 to 16 min of panel D.

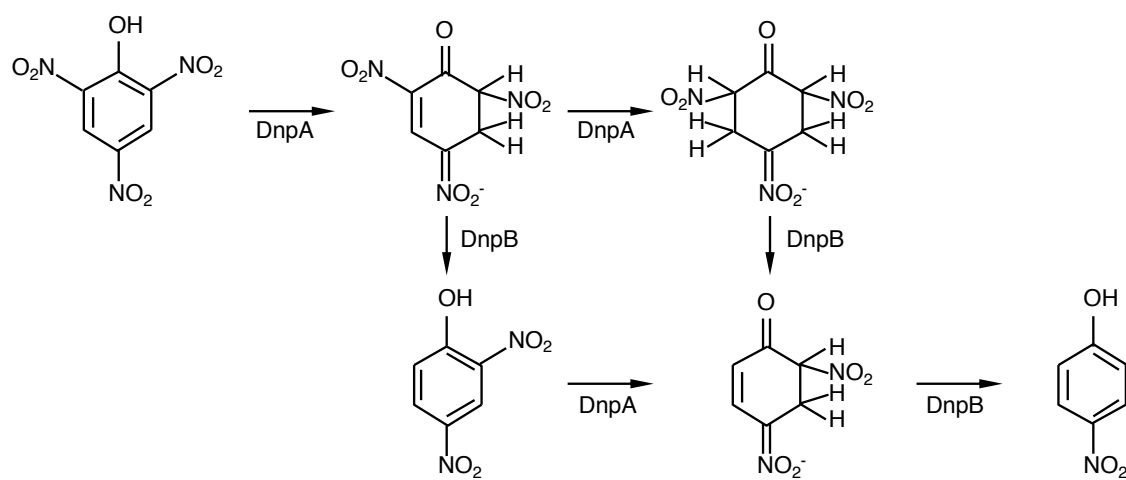

804

805 Fig. 8. Proposed reaction sequence of NP and DNP formation from PA by DnpA and DnpB.

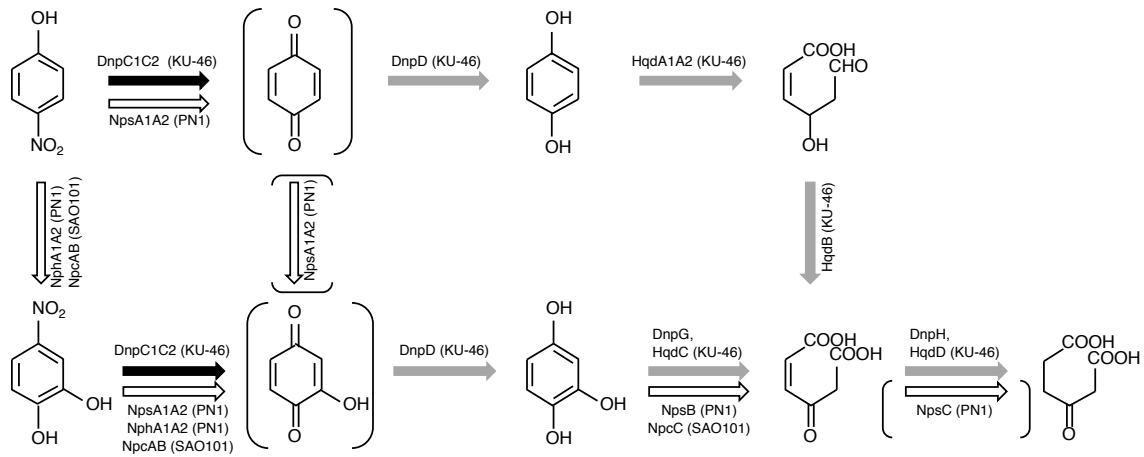

806

807 Fig. 9. Known 4-NP degradation pathways. Black arrows indicate DpdC1C2 reaction, and gray arrows  
 808 indicate the reactions presumed with DNA sequence of strain KU-46. Open arrows indicate the  
 809 pathway from *Rhodococcus* spp., and the two reactions that have not been supported by biochemical  
 810 results are indicated by the arrows in parentheses.
